# Supplementary material
Source: Royal Society of Chemistry journal article supplement (doi:10.1039/d6em00173d)
Supplement: d6em00173d1.pdf [file d6em00173d1.pdf]

Appendix A: Supplementary Material for

## **Hydrophobic Model Systems for Oil Film Photooxidation:**

### **Part II: Direct and Indirect Pathways Controlled by Oxygen and Molecular Structure**

Bin Wu\* <sup>a,b</sup>, Manoj Rayaroth <sup>c</sup>, and Christoph Aeppli <sup>a,b</sup>

<sup>a</sup>*Bigelow Laboratory for Ocean Sciences, 60 Bigelow Dr, East Boothbay, ME, USA.*

<sup>b</sup>*Colby College, 5750 Mayflower Hill Drive, Waterville, ME, 04901, USA*

<sup>c</sup>*Department of Chemistry, GITAM School of Science, GITAM (Deemed to be) University, Rushikonda, Visakhapatnam, 530045, India*

\*Corresponding author. Bin Wu, email: [bwu@bigelow.org](mailto:bwu@bigelow.org)

This supporting information contains:

Number of pages: 29

Number of supplementary material sections: 7

Number of figures: 176

Number of tables: 9

# Table of Contents

|                                                                                                                                                                                                             |           |
|-------------------------------------------------------------------------------------------------------------------------------------------------------------------------------------------------------------|-----------|
| <b>Table of Contents</b> .....                                                                                                                                                                              | <b>2</b>  |
| <b>Section A1 Quantum yield calculation</b> .....                                                                                                                                                           | <b>3</b>  |
| <i>Text A1.1. Quantum yield calculation</i> .....                                                                                                                                                           | 3         |
| <i>Table A1.1 Literature value of Literature-reported quantum yields for the direct photolysis of PAHs</i> 4                                                                                                |           |
| <b>Section A2 Apparent quantum yield calculations</b> .....                                                                                                                                                 | <b>5</b>  |
| <i>Text A2.1. Apparent quantum yield calculations</i> .....                                                                                                                                                 | 5         |
| <b>Section A3 Analytical Methods</b> .....                                                                                                                                                                  | <b>6</b>  |
| <i>Text A3.1 UV-Vis method</i> .....                                                                                                                                                                        | 6         |
| <i>Text A3.2 Oxygen measurement</i> .....                                                                                                                                                                   | 6         |
| <i>Table A3.3 Monitored m/z values and chromatographic retention times for target compounds</i> .....                                                                                                       | 6         |
| <i>Figure A3.4. Representative SIM chromatogram of target PAHs. Compounds were monitored using characteristic molecular ions: indane (m/z 117), naphthalene (m/z 128)</i> .....                             | 7         |
| <b>Section A4 Oxygen and solvent effect on photolysis</b> .....                                                                                                                                             | <b>8</b>  |
| <i>Table A4.1: ANT and 9MA direct photolysis first order reaction rate constant in toluene and hexane in the presence and absence of oxygen</i> .....                                                       | 8         |
| <i>Table A4.2: Model compounds indirect photolysis first order reaction rate constant in toluene in the presence and absence of oxygen</i> .....                                                            | 8         |
| <i>Figure A4.3 The photolysis of target compounds in the absence and presence of photosensitizers (A logarithmic scale was applied to improve readability given the wide range of rate constants)</i> ..... | 9         |
| <b>Section A5 Singlet oxygen quantum yield and triplet state reduction potential of photosensitizers and PAHs</b> .....                                                                                     | <b>10</b> |
| <i>Table A5.1: Singlet oxygen quantum yield and triplet state reduction potential of photosensitizers and PAHs</i> .....                                                                                    | 10        |
| <i>Table A5.2 The second-order reaction rate constant of singlet oxygen with HCs (<math>k_{rM^{-1} s^{-1}}</math>)</i> .....                                                                                | 11        |
| <b>Section A6 The spectral incident photon flux of the lamps and the UV-Vis absorption Spectra of compounds</b> .....                                                                                       | <b>12</b> |
| <i>Figure A6.1 The spectral incident photon flux of the lamps</i> .....                                                                                                                                     | 13        |
| <i>Figure A6.2 The UV-Vis absorption Spectra (280-400 nm)</i> .....                                                                                                                                         | 13        |
| <b>Section A7 Kinetics data for model compounds</b> .....                                                                                                                                                   | <b>14</b> |
| <i>Table A7.1: Dark Control and direct photolysis of hydrocarbon mixtures*</i> .....                                                                                                                        | 14        |
| <i>Table A7.2 Quencher effect on ANT and 9MA indirect photolysis</i> .....                                                                                                                                  | 14        |
| <i>Fig. A7.3 First-Order Kinetics of Compounds (95% Confidence Interval) Unless otherwise noted, all experiments were conducted in air-saturated conditions.</i> .....                                      | 26        |

## Section A1 Quantum yield calculation and literature values

### Text A1.1. Quantum yield calculation

The integrated irradiance for the nitrate actinometer is to determine by (Eq. (1)):

$$E = \frac{-1}{2.303 \times \phi_{SA} \times \epsilon_{SA}} \ln \left[ \frac{\phi_{NO_3^-} \times \epsilon_{NO_3^-} \times [NO_3^-]_1}{\phi_{NO_3^-} \times \epsilon_{NO_3^-} \times [NO_3^-]_0} - \frac{f(\epsilon_{NO_3^-}) \times \phi_{NO_3^-} \times [SA]_1}{f(\epsilon_{NO_3^-}) \times \phi_{NO_3^-} \times [SA]_0} \right] \quad (1)$$

Then, the quantum yield could be calculated with Eq. (2):

$$\phi_{model} = \frac{k_{model}}{1000} \cdot \frac{l}{\sum E_{\lambda} (1 - 10^{-\epsilon_{\lambda} [model]_0 \Delta \lambda})} \cdot [model]_0 \quad (2)$$

where  $\phi_{SA}$  (mol SA degraded per mol photons absorbed by SA) and  $\epsilon_{SA}$  ( $\text{cm}^2 \text{mol}^{-1}$ ) represent the mean quantum yield and molar absorption coefficient of SA, respectively, over the SA degradation response band. Similarly,  $\phi_{SA}$  (mol SA formed per mol photons absorbed by nitrate) and  $\epsilon_{SA}$  ( $\text{cm}^2 \text{mol}^{-1}$ ) refer to the mean quantum yield and molar absorption coefficient for nitrate over the nitrate actinometer response band.

$[NO_3^-]$  is the initial concentration of nitrate ( $\text{mol L}^{-1}$ ), while  $[SA]_0$  and  $[SA]_1$  are the initial and final concentrations of salicylic acid ( $\text{mol L}^{-1}$ ) in the actinometric solution after irradiation. The correction factor  $f$  accounts for differences in spectral overlap between nitrate absorption and SA formation, specifically the fraction of available irradiance within the SA degradation bandwidth relative to that within the nitrate actinometer response band. This correction ensures accurate photon flux determination even when SA absorbance is non-negligible. In Eq. (2),  $\epsilon_{\lambda}$  and  $L_{\lambda}$  are the molar absorptivity and the irradiance at a specific wavelength, respectively.  $\rho_{\lambda}$  is

the relative spectral photon irradiance determined by Equation (4) where  $\Delta\lambda$  is 1 nm and the summation is from 280 to 400 nm. The molar absorptivity of model compounds and  $\text{NO}_3^-$  were measured using a UV spectrophotometer. The irradiance data in the solar simulator was measured by the spectrometer.

**Table A1.1** Literature-reported quantum yields for the direct photolysis of PAHs

| <b>Compound</b>     | <b>Ring number</b> | <b>Quantum yield in toluene (<math>10^{-5}</math>)</b> | <b>Quantum yield in water (<math>10^{-3}</math>)</b>                                                                                            |
|---------------------|--------------------|--------------------------------------------------------|-------------------------------------------------------------------------------------------------------------------------------------------------|
| naphthalene         | 2                  | N/A                                                    | $15 \pm 1(313 \text{ nm})^1$                                                                                                                    |
| phenanthrene        | 3                  | N/A                                                    | $10 \pm 1.6(313 \text{ nm})^1$<br>$3.0 \pm 0.2(366 \text{ nm})^1$                                                                               |
| anthracene          | 3                  | N/A                                                    | $1(1(313 \text{ nm})^1, 1(aerated)(350 \text{ nm})^2, 12(\text{degassed})(350 \text{ nm})^2, 182-0.241(254 \text{ nm})^3, 96(254 \text{ nm})^4$ |
| 9 methyl anthracene | 3                  | N/A                                                    | $7.5 \pm 0.5(313 \text{ nm})^1$                                                                                                                 |
| benzo[a]anthracene  | 4                  | $6.2 \pm 0.4(366 \text{ nm})^5$                        | $3.3 \pm 0.1(313 \text{ nm}, 366 \text{ nm})^6$                                                                                                 |
| chrysene            | 4                  | $6.7 \pm 0.2(>300 \text{ nm})^5$                       | $2.8 \pm 0.7(313 \text{ nm})^1$                                                                                                                 |
| pyrene              | 4                  | N/A                                                    | $2.0 \pm 0.3(313 \text{ nm})^7$<br>$2.2 \pm 0.3(366 \text{ nm})^7$                                                                              |
| benzo[a]pyrene      | 5                  | $3.4 \pm 0.3(366 \text{ nm})^5$                        | $0.89(313 \text{ nm})^6$<br>$0.54(366 \text{ nm})^6$                                                                                            |
| benzo[e]pyrene      | 5                  | $5.5 \pm 0.2(>300 \text{ nm})^5$                       | N/A                                                                                                                                             |

## Section A2 Apparent quantum yield calculations

### Text A2.1. Apparent quantum yield calculations

The light absorption rate is calculated with the equation below.

$$Ra = \sum_{280nm}^{400nm} I_{\lambda} (1 - 10^{-a_{\lambda,SEN} l})$$

Where Ra is the photosensitizer light absorption rate.  $I_{\lambda}$  is the spectral irradiance.

The  $a_{\lambda,SEN}$  is represented as the light attenuation coefficient for photosensitizers (the measured absorbance for a given wavelength when the cuvette path length is 1 cm)

The apparent quantum yield in the different photosensitizer present in the solution is calculated by the equation.

$$\varphi_{apparent} = \frac{k_{model}}{1000} \cdot \frac{l}{\sum E_{\lambda} (1 - 10^{-\epsilon_{\lambda} l [photosensitizer]_0}) \Delta\lambda} \cdot [model]_0$$

**Table A2.1** The apparent quantum yield of ANT and 9MA by the light absorption rates in the reaction with photosensitizers (BaP, MBaP, PYR and MPYR only in present of tetracene)

| Photosensitizer | $\varphi_{apparent}$  |                       |                       |                       |                       |                       |
|-----------------|-----------------------|-----------------------|-----------------------|-----------------------|-----------------------|-----------------------|
|                 | ANT                   | 9MA                   | BaP                   | MBaP                  | PYR                   | MPYR                  |
| Phenaleone      | $6.90 \times 10^{-4}$ | $3.96 \times 10^{-4}$ | N/A                   | N/A                   | N/A                   | N/A                   |
| Tetracene       | $3.10 \times 10^{-3}$ | $2.41 \times 10^{-3}$ | $3.17 \times 10^{-3}$ | $4.91 \times 10^{-3}$ | $1.12 \times 10^{-3}$ | $3.16 \times 10^{-3}$ |
| Naphthol        | $1.77 \times 10^{-3}$ | $1.17 \times 10^{-3}$ | N/A                   | N/A                   | N/A                   | N/A                   |
| Xanthone        | $1.52 \times 10^{-3}$ | $6.94 \times 10^{-4}$ | N/A                   | N/A                   | N/A                   | N/A                   |
| Anthraquinone   | $1.96 \times 10^{-3}$ | $9.67 \times 10^{-4}$ | N/A                   | N/A                   | N/A                   | N/A                   |

## Section A3 Analytical Methods

### Text A3.1 UV-Vis method

Visible ultraviolet (UV-Vis) absorption spectra of Butylbenzene, Indane, naphthalene, 2-ethylnaphthlene, phenanthrene, anthracene, 9-methyl-anthracene, butyl cyclohexane, decalin, hexadecane, squalene, phenalenone, tetracene, naphthol, xanthone, and anthraquinone were obtained using an Agilent 1601UV-PC dual beam spectrophotometer from 200–800 nm in 1-cm quartz cuvettes, with a scan speed of 2400 nm min<sup>-1</sup> and a 1.0 nm interval.

### Text A3.2 Oxygen measurement

The partial pressure of oxygen (pO<sub>2</sub>, in hPa) was measured using the FireSting-O<sub>2</sub> fiber-optic oxygen meter (PyroScience), equipped with the solvent-resistant probe tip OXSOLV-PT. The sensor was calibrated using a two-point method: ambient air as the high-oxygen reference and a 1% sodium sulfite solution in water as the zero-oxygen reference. The saturated oxygen concentration in air-saturated solvent can be calculated as below:

$$C_{O_2} = \frac{P_{O_2}}{P_N} \alpha \frac{M_{O_2}}{V_{O_2}}$$

Where:

C<sub>O<sub>2</sub></sub>: saturated oxygen concentration

P<sub>O<sub>2</sub></sub>: partial pressure of oxygen

P<sub>N</sub>: atmospheric pressure

α: absorption coefficient for solvents (α<sub>toluene</sub> = 21.49; α<sub>hexane</sub> = 89.91)

M<sub>O<sub>2</sub></sub>: molar mass of oxygen (32 g/l)

V<sub>O<sub>2</sub></sub>: molar volume of oxygen (22.414 l/mol)

**Table A3.3** Monitored m/z values and chromatographic retention times for target compounds.

| Compounds | m/z | Retention time |
|-----------|-----|----------------|
| ANT       | 178 | 20.37          |
| 9MA       | 192 | 21.9           |
| PYR       | 202 | 20             |
| MPYR      | 212 | 23.945         |
| BaP       | 255 | 27.195         |
| MBaP      | 262 | 28.19          |
| HEX       | 57  | 17.1           |
| BCH       | 83  | 8.211          |
| BBZ       | 91  | 8.88           |
| IND       | 117 | 8.551          |
| NAP       | 128 | 11.751         |
| DEC       | 138 | 9.84           |
| PHE       | 178 | 20.218         |
| SQU       | 57  | 24.8           |
| 2EN       | 141 | 15.006         |

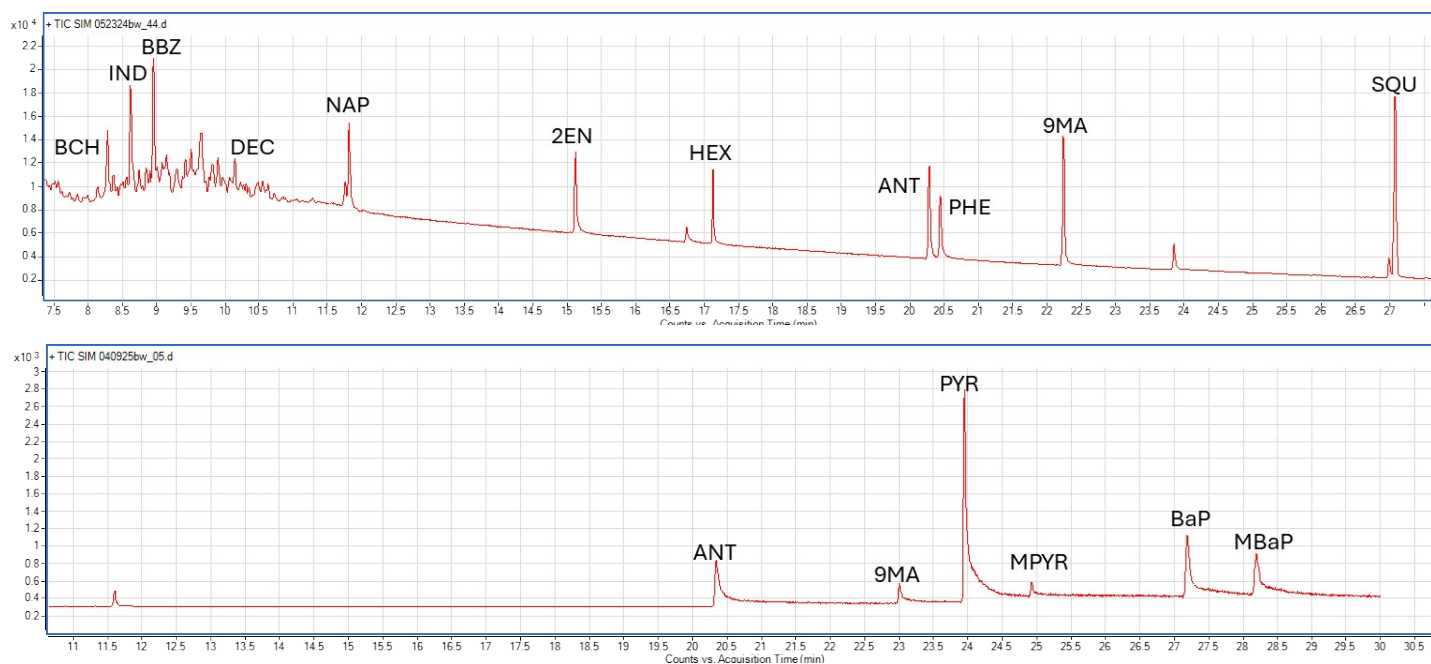

**Figure A3.4.** Representative SIM chromatogram of target PAHs.

## Section A4 Oxygen and solvent effect on photolysis

**Table A4.1:** ANT and 9MA direct photolysis first order reaction rate constant in

| Compounds | $k/h^{-1}$    |                         |               |                         |
|-----------|---------------|-------------------------|---------------|-------------------------|
|           | toluene       |                         | hexane        |                         |
|           | Air-saturated | N <sub>2</sub> -purging | Air-saturated | N <sub>2</sub> -purging |
| ANT       | 0.13±0.03     | 0.13±0.014              | 0.11±0.051    | 0.10±0.025              |
| 9MA       | 0.56±0.075    | 0.62±0.094              | 0.57±0.042    | 0.67±0.078              |

toluene and hexane in the presence and absence of oxygen

**Table A4.2:** Model compounds indirect photolysis first order reaction rate constant in toluene in the presence and absence of oxygen

| Compounds | Sensitizer    | $k/h^{-1}$    |                         | Relative Removal rate |
|-----------|---------------|---------------|-------------------------|-----------------------|
|           |               | Air-saturated | N <sub>2</sub> -purging | Air-saturated         |
| ANT       | Phenalenone   | 0.59±0.02     | 0.48±0.066              | 4.38                  |
|           | Tetracene     | 0.51±0.049    | 0.33±0.019              | 3.92                  |
|           | Naphthol      | 0.37±0.11     | 0.32±0.1                | 2.85                  |
|           | Xanthone      | 0.53±0.13     | 0.29±0.12               | 4.08                  |
|           | Anthraquinone | 0.52±0.1      | 0.48±0.1                | 4.08                  |
| 9MA       | Phenalenone   | 0.7±0.11      | 1.03±0.25               | 1.23                  |
|           | Tetracene     | 0.68±0.078    | 0.54±0.27               | 1.19                  |
|           | Naphthol      | 0.59±0.1      | 0.58±0.14               | 1.04                  |
|           | Xanthone      | 0.54±0.11     | 0.52±0.17               | 0.98                  |
|           | Anthraquinone | 0.56±0.11     | 0.45±0.19               | 0.98                  |
| BaP       | Tetracene     | 0.89±0.11     | 1.064±0.11              | 3.3                   |
| MBaP      | Tetracene     | 1.4±0.19      | 1.29±0.11               | 3.1                   |
| PYR       | Tetracene     | 0.34±0.052    | 0.32±0.03               | 2.62                  |
| MPYR      | Tetracene     | 1.31±0.17     | 0.99±0.006              | 1.85                  |
| BCH       | Phenalenone   | 0.014±0.004   | n.a.                    | 0.88                  |
|           | Tetracene     | 0.02±0.004    | n.a.                    | 1.25                  |
|           | Naphthol      | 0.015±0.005   | n.a.                    | 0.94                  |
|           | Xanthone      | 0.015±0.003   | n.a.                    | 0.94                  |
|           | Anthraquinone | 0.018±0.004   | n.a.                    | 1.12                  |
| IND       | Phenalenone   | 0.018±0.004   | n.a.                    | 1                     |
|           | Tetracene     | 0.021±0.003   | n.a.                    | 1.17                  |
|           | Naphthol      | 0.015±0.005   | n.a.                    | 0.83                  |
|           | Xanthone      | 0.019±0.003   | n.a.                    | 1.06                  |
|           | Anthraquinone | 0.023±0.005   | n.a.                    | 1.28                  |
|           | Phenalenone   | 0.011±0.003   | n.a.                    | 1                     |

|     |               |             |      |      |
|-----|---------------|-------------|------|------|
|     | Tetracene     | 0.012±0.007 | n.a. | 1.09 |
|     | Naphthol      | 0.014±0.003 | n.a. | 1.27 |
|     | Xanthone      | 0.011±0.002 | n.a. | 1    |
|     | Anthraquinone | 0.017±0.005 | n.a. | 1.55 |
| DEC | Phenalenone   | 0.02±0.004  | n.a. | 0.95 |
|     | Tetracene     | 0.023±0.007 | n.a. | 0.86 |
|     | Naphthol      | 0.018±0.005 | n.a. | 1    |
|     | Xanthone      | 0.02±0.004  | n.a. | 1.19 |
|     | Anthraquinone | 0.025±0.005 | n.a. | 0.48 |
| NAP | Phenalenone   | 0.008±0.003 | n.a. | 0.8  |
|     | Tetracene     | 0.016±0.006 | n.a. | 1.6  |
|     | Naphthol      | 0.011±0.002 | n.a. | 1.1  |
|     | Xanthone      | 0.022±0.002 | n.a. | 2.2  |
|     | Anthraquinone | 0.025±0.005 | n.a. | 2.5  |
| 2EN | Phenalenone   | 0.033±0.004 | n.a. | 1.27 |
|     | Tetracene     | 0.029±0.002 | n.a. | 1.12 |
|     | Naphthol      | 0.028±0.004 | n.a. | 1.08 |
|     | Xanthone      | 0.038±0.005 | n.a. | 1.46 |
|     | Anthraquinone | 0.037±0.003 | n.a. | 1.42 |
| HEX | Phenalenone   | 0.014±0.006 | n.a. | 0.7  |
|     | Tetracene     | 0.012±0.009 | n.a. | 0.6  |
|     | Naphthol      | 0.019±0.003 | n.a. | 0.95 |
|     | Xanthone      | 0.003±0.003 | n.a. | 0.75 |
|     | Anthraquinone | 0.008±0.007 | n.a. | 1.85 |
| SQU | Phenalenone   | 0.02±0.004  | n.a. | 1.59 |
|     | Tetracene     | 0.015±0.008 | n.a. | 0.88 |
|     | Naphthol      | 0.022±0.004 | n.a. | 1.29 |
|     | Xanthone      | 0.038±0.005 | n.a. | 1.12 |
|     | Anthraquinone | 0.016±0.01  | n.a. | 0.94 |
| PHE | Phenalenone   | 0.016±0.01  | n.a. | 1.53 |
|     | Tetracene     | 0.038±0.011 | n.a. | 2.53 |
|     | Naphthol      | 0.029±0.008 | n.a. | 1.93 |
|     | Xanthone      | 0.091±0.01  | n.a. | 6.07 |
|     | Anthraquinone | 0.1±0.008   | n.a. | 6.67 |

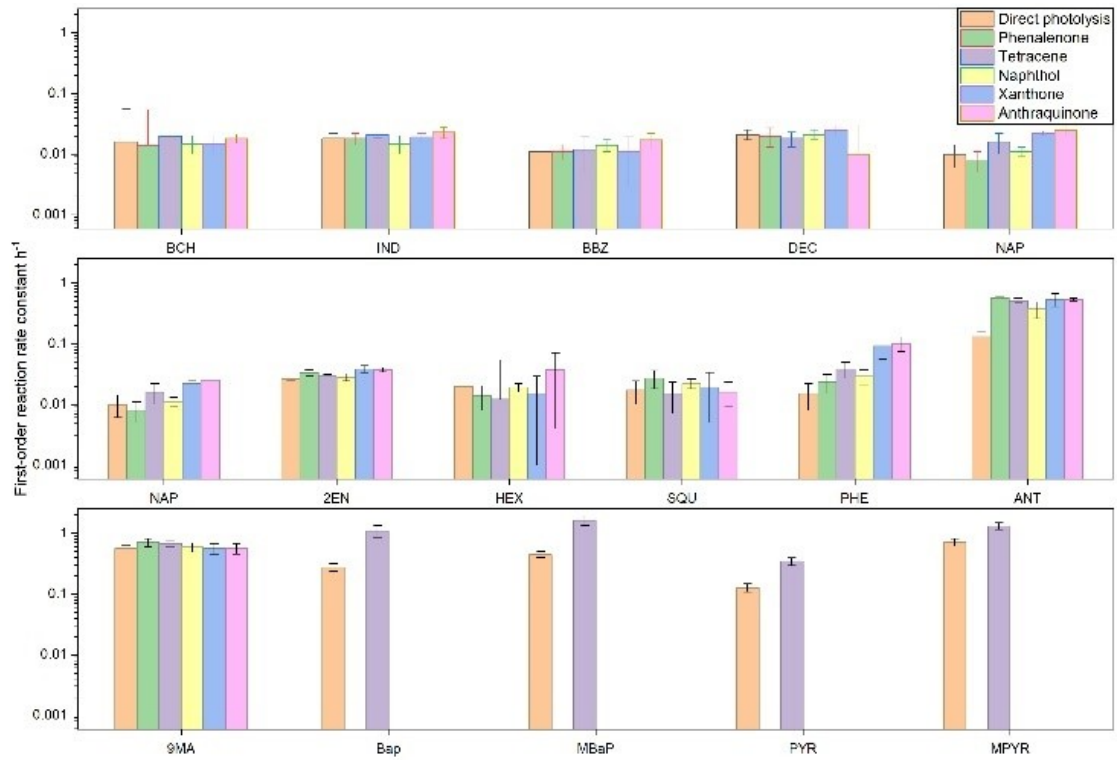

**Figure A4.3** The photolysis of target compounds in the absence and presence of photosensitizers\*

\*A logarithmic scale was applied to improve readability given the wide range of rate constants

Section A5 Singlet oxygen quantum yield and triplet state reduction potential of photosensitizers and PAHs

**Table A5.1** Singlet oxygen quantum yield and triplet state reduction potential of photosensitizers and PAHs

| photosensitizers | Quantum yield of $^1\text{O}_2$ | $E^{0*} (^3\text{S}^*/\text{S}^-)^f$ |
|------------------|---------------------------------|--------------------------------------|
| Phenalenone      | 0.95 <sup>a</sup>               | 1.03                                 |
| Tetracene        | 0.68-0.86 <sup>b</sup>          | n.a.                                 |
| Xanthone         | 0.27 <sup>c</sup>               | 1.96                                 |
| AQ               | 0.62 <sup>d</sup>               | 2.23                                 |
| PHE              | 0.33 <sup>e</sup>               | 0.46                                 |
| NAP              | 0.5 <sup>e</sup>                | 0.37                                 |
| ANT              | 0.61 <sup>e</sup>               | 0.15                                 |

a:<sup>8</sup>; b:<sup>9-11</sup>; c:<sup>12</sup>; d:<sup>13</sup>; e:<sup>14</sup>; f<sup>15</sup>

**Table A5.2** The second-order reaction rate constant of singlet oxygen with HCs ( $k_r$  M<sup>-1</sup> s<sup>-1</sup>)

| Compound  | $k_r(^1\text{O}_2)$ M <sup>-1</sup> s <sup>-1</sup>              |
|-----------|------------------------------------------------------------------|
| NAP       | $5.2 \times 10^8$ <sup>16</sup>                                  |
| ANT       | $1.2 \times 10^4$ - $5.4 \times 10^5$ <sup>17-20</sup>           |
| 9MA       | $2 \times 10^6$ - $9.6 \times 10^7$ <sup>17, 20, 21</sup>        |
| Toluene   | $3.9 \times 10^3$ (CCl <sub>4</sub> as solvent) <sup>22</sup>    |
| BAP       | $7.5 \times 10^5$ <sup>5</sup>                                   |
| Tetracene | $5 \times 10^6$ - $5.2 \times 10^8$ <sup>11, 16, 20, 23-25</sup> |

Section A6 The spectral incident photon flux of the lamps and the UV-Vis absorption Spectra of compounds

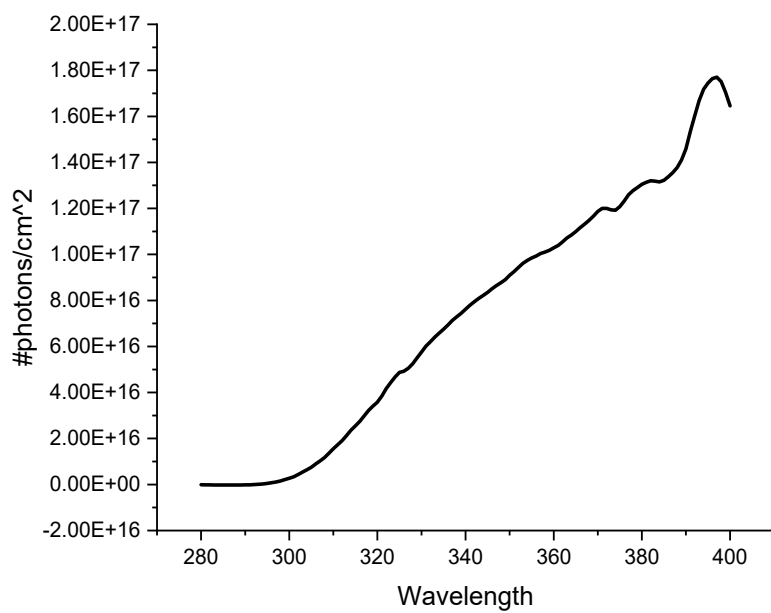

Figure A6.1 The spectral incident photon flux of the lamps

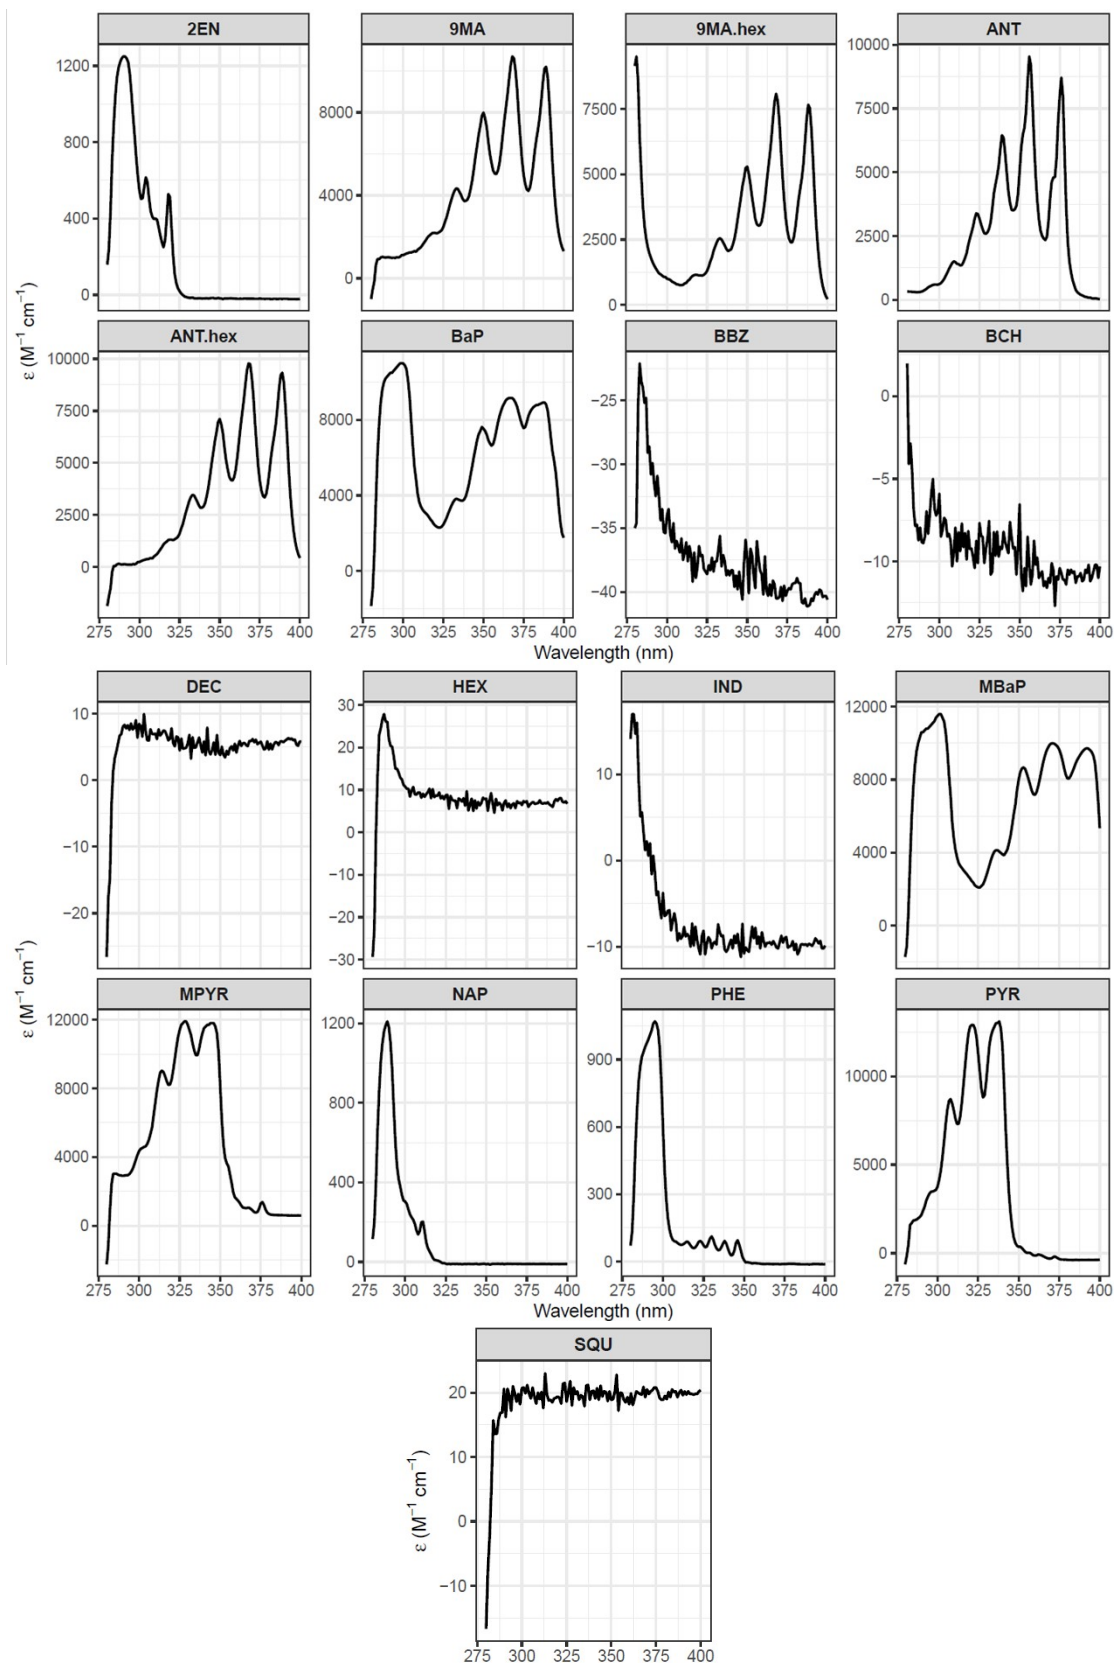

Figure A6.2 The UV-Vis absorption Spectra (280-400 nm) \*

\* All compounds were investigated in toluene, unless otherwise noted.

## Section A7 Kinetics data for model compounds

**Table A7.1** Dark Control and direct photolysis of hydrocarbon mixtures<sup>#</sup>

Corresponding kinetic plots are shown in Fig. 1.

| Compounds                   | CAS number | First-order                                                   | First-order                                     | p-value  | Quantum yield                    |
|-----------------------------|------------|---------------------------------------------------------------|-------------------------------------------------|----------|----------------------------------|
|                             |            | reaction rate<br>constant<br>(h <sup>-1</sup> , Dark control) | reaction rate<br>constant<br>(h <sup>-1</sup> ) |          |                                  |
| BCH                         | 1678-93-9  | (0.7 ± 2.0) × 10 <sup>-3</sup>                                | 0.016 ± 0.039*                                  | 0.0025   | not calculated                   |
| IND                         | 496-11-7   | (0.7 ± 2.0) × 10 <sup>-3</sup>                                | 0.018 ± 0.004 *                                 | 0.0016   | not calculated                   |
| BBZ                         | 104-51-8   | (1.3 ± 2.0) × 10 <sup>-3</sup>                                | 0.011 ± 0.004 *                                 | 0.033    | not calculated                   |
| DEC                         | 91-17-8    | (1.4 ± 1.0) × 10 <sup>-3</sup>                                | 0.021 ± 0.004 *                                 | 0.0006   | not calculated                   |
| NAP                         | 91-20-3    | (0.6 ± 3.0) × 10 <sup>-3</sup>                                | 0.01 ± 0.004 *                                  | 0.046    | not calculated                   |
| 2EN                         | 939-27-5   | (2.7 ± 3.0) × 10 <sup>-3</sup>                                | 0.026 ± 0.002 *                                 | 0.000002 | not calculated                   |
| HEX                         | 544-76-3   | (2.0 ± 2.0) × 10 <sup>-3</sup>                                | 0.02 ± 0.005 *                                  | 0.005    | not calculated                   |
| SQU                         | 111-02-4   | (2.8 ± 3.0) × 10 <sup>-3</sup>                                | 0.017 ± 0.007 *                                 | 0.039    | not calculated                   |
| PHE                         | 85-01-8    | (0.4 ± 4.0) × 10 <sup>-3</sup>                                | 0.015 ± 0.007 (n.s.)                            | 0.152    | not calculated                   |
| ANT<br>(Toluene as solvent) | 120-12-7   | (1.2 ± 3.0) × 10 <sup>-3</sup>                                | 0.13 ± 0.03*                                    | 0.022    | (6.21 ± 0.91) × 10 <sup>-5</sup> |
| 9MA<br>(Toluene as solvent) | 779-02-2   | (3.9 ± 2.0) × 10 <sup>-3</sup>                                | 0.56 ± 0.075*                                   | 0.005    | (1.08 ± 0.1) × 10 <sup>-4</sup>  |
| ANT<br>(Hexane as solvent)  | 120-12-7   | Not measured                                                  | 0.11 ± 0.051 *                                  | 0.12     | (4 ± 1.86) × 10 <sup>-5</sup>    |
| 9MA<br>(Hexane as solvent)  | 779-02-2   | Not measured                                                  | 0.57 ± 0.041*                                   | 0.0008   | (1.98 ± 0.14) × 10 <sup>-4</sup> |
| BaP                         | 50-32-8    | Not measured                                                  | 0.27 ± 0.045 *                                  | 0.009    | (2.56 ± 0.43) × 10 <sup>-5</sup> |
| MBaP                        | 63041-77-0 | Not measured                                                  | 0.45 ± 0.051 *                                  | 0.003    | (3.84 ± 0.44) × 10 <sup>-5</sup> |
| PYR                         | 129-00-0   | Not measured                                                  | 0.13 ± 0.024 *                                  | 0.014    | (1.0 ± 0.2) × 10 <sup>-5</sup>   |
| MPYR                        | 2381-21-7  | Not measured                                                  | 0.71 ± 0.078 *                                  | 0.003    | (8.64 ± 0.1) × 10 <sup>-5</sup>  |

<sup>#</sup> All compounds were investigated in toluene, unless otherwise noted.

n.s. = not significant (p ≥ 0.05), \* = significant degradation (p < 0.05)

**Table A7.2** Quencher effect on ANT and 9MA indirect photolysis

| Compounds   | Sensitizer    | $k\ h^{-1}$ |                |                  |                |
|-------------|---------------|-------------|----------------|------------------|----------------|
|             |               | No quencher | 50 $\mu$ M HDA | 50 $\mu$ M DABCO | 50 $\mu$ M FFA |
| <b>ANT</b>  | Phenalenone   | 0.59±0.02   | 0.38±0.035     | 0.22±0.06        | 0.31±0.12      |
|             | Tetracene     | 0.51±0.049  | 0.60±0.085     | 0.17±0.036       | 0.20±0.071     |
|             | Naphthol      | 0.37±0.11   | 0.68±0.17      | 0.44±0.063       | 0.22±0.017     |
|             | Xanthone      | 0.53±0.13   | 0.65±0.54      | 0.42±0.13        | 0.13±0.058     |
|             | Anthraquinone | 0.52±0.1    | 0.48±0.21      | 0.36±0.08        | 0.27±0.058     |
| <b>9MA</b>  | Phenalenone   | 0.7±0.11    | 1.07±0.35      | 0.96±0.11        | 0.32±0.1       |
|             | Tetracene     | 0.68±0.078  | 0.78±0.33      | 0.65±0.17        | 0.45±0.15      |
|             | Naphthol      | 0.59±0.1    | 0.71±0.17      | 0.42±0.076       | 0.48±0.15      |
|             | Xanthone      | 0.54±0.11   | 0.41±0.21      | 0.41±0.16        | 0.54±0.09      |
|             | Anthraquinone | 0.56±0.11   | 0.36±0.21      | 0.41±0.09        | 0.50±0.14      |
| <b>Bap</b>  | Tetracene     | 0.89±0.11   | n.a.           | 0.24±0.016       | n.a.           |
| <b>MBaP</b> | Tetracene     | 1.4±0.19    | n.a.           | 0.41±0.023       | n.a.           |
| <b>PYR</b>  | Tetracene     | 0.34±0.052  | n.a.           | 0.07±0.009       | n.a.           |
| <b>MPYR</b> | Tetracene     | 1.31±0.17   | n.a.           | 0.73±0.044       | n.a.           |

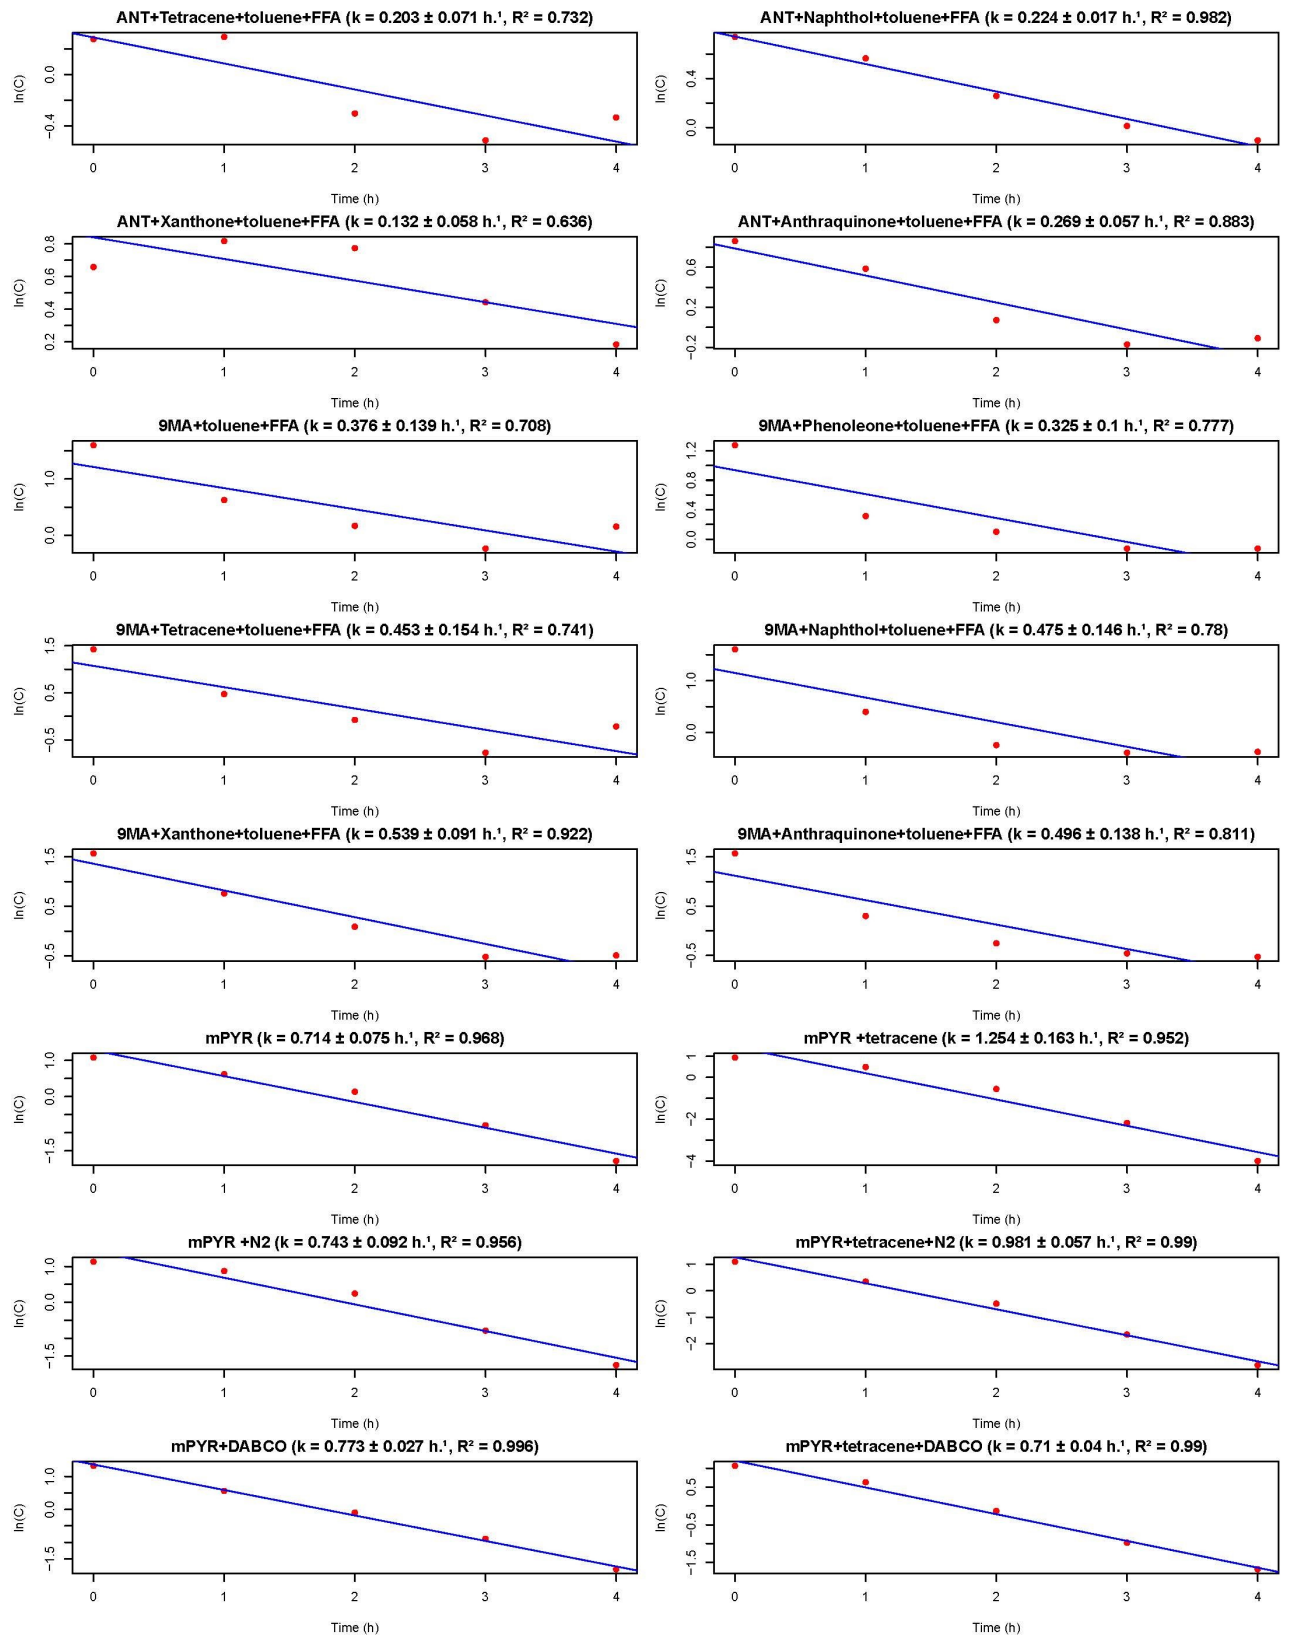

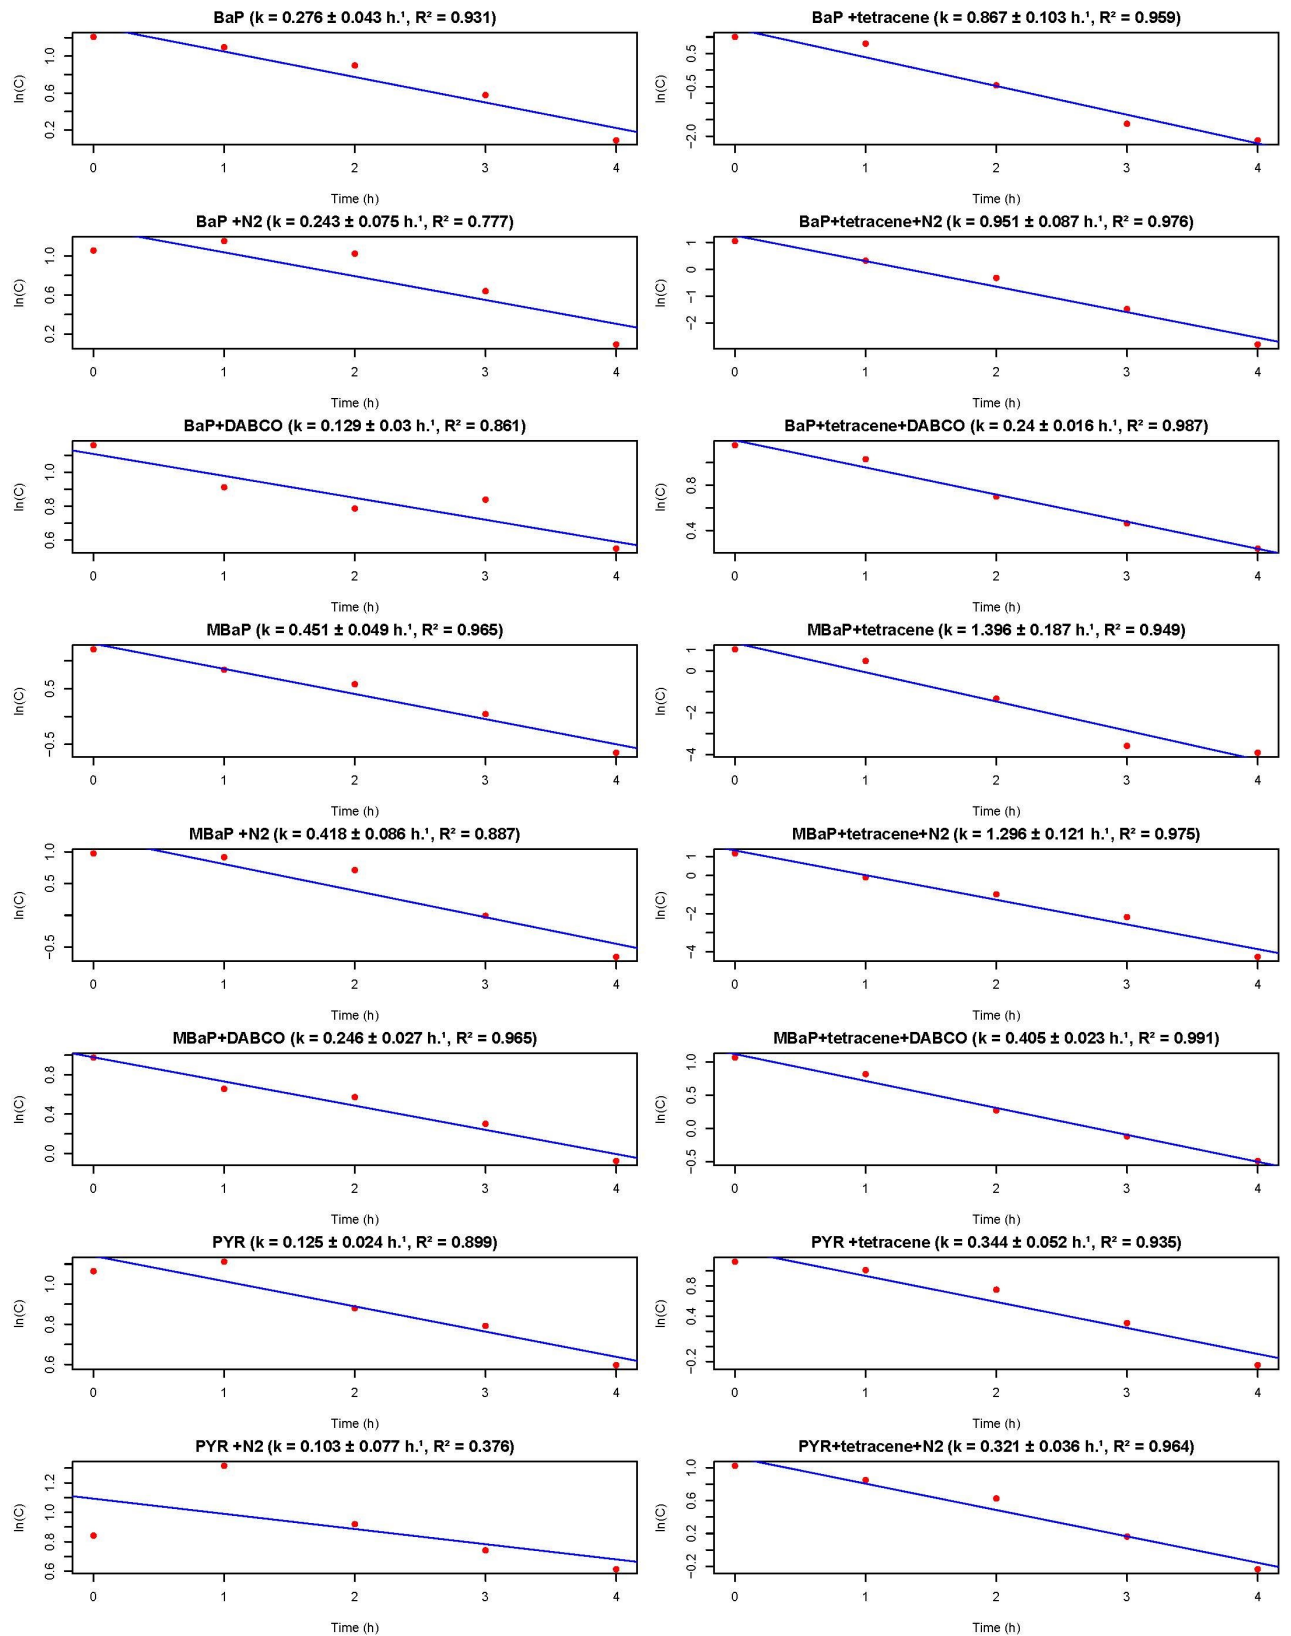

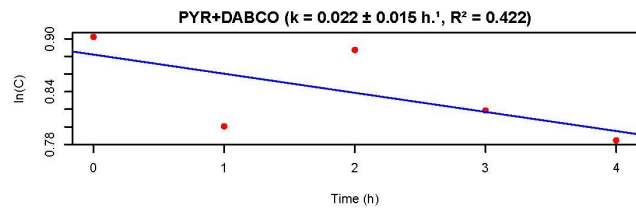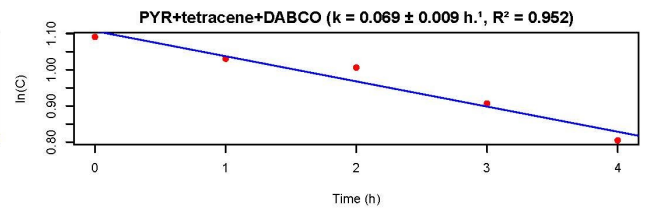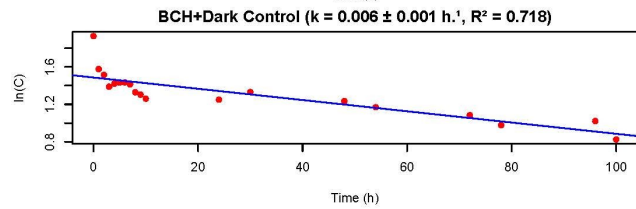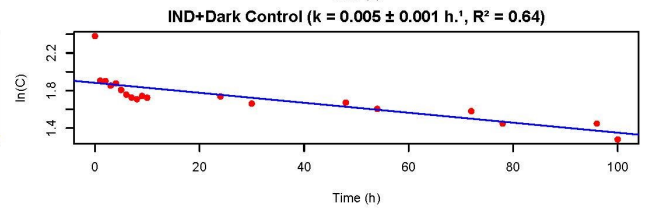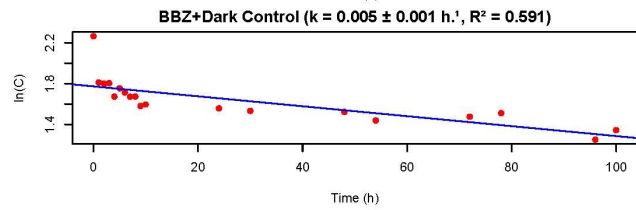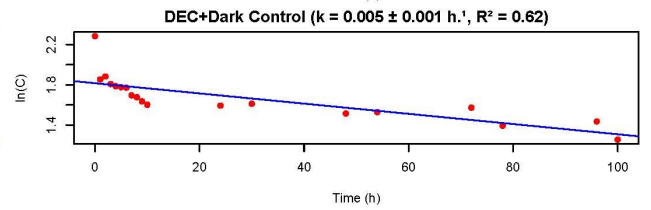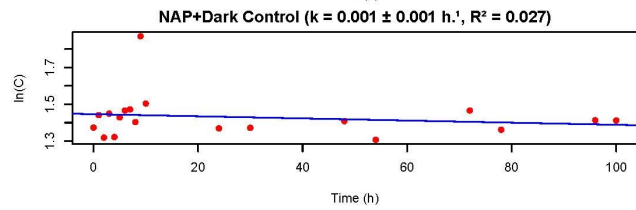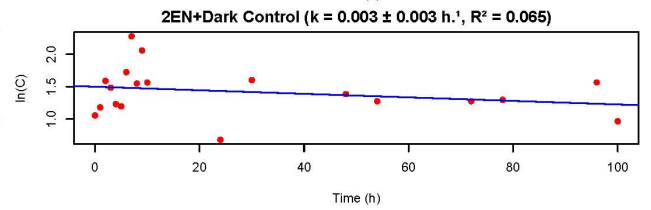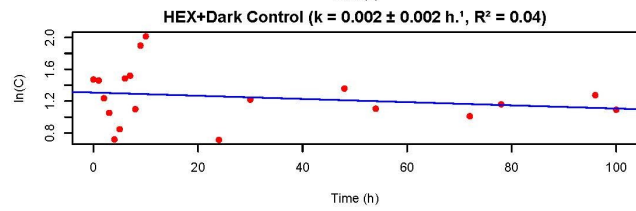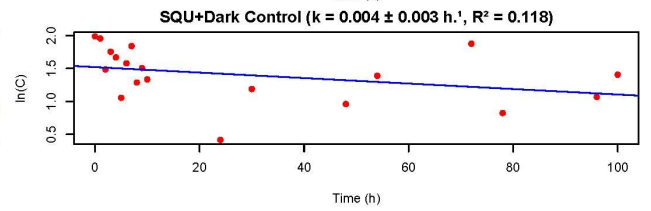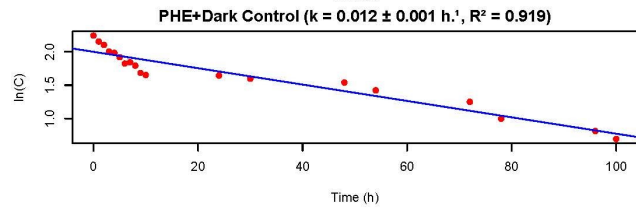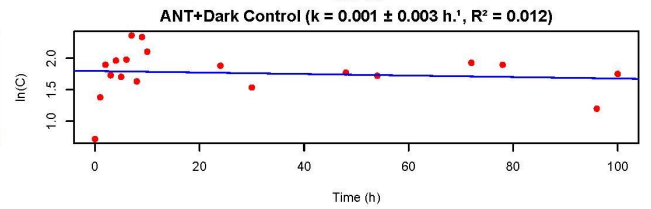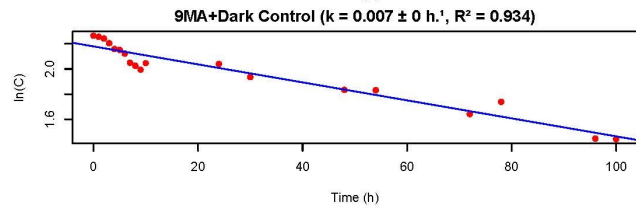

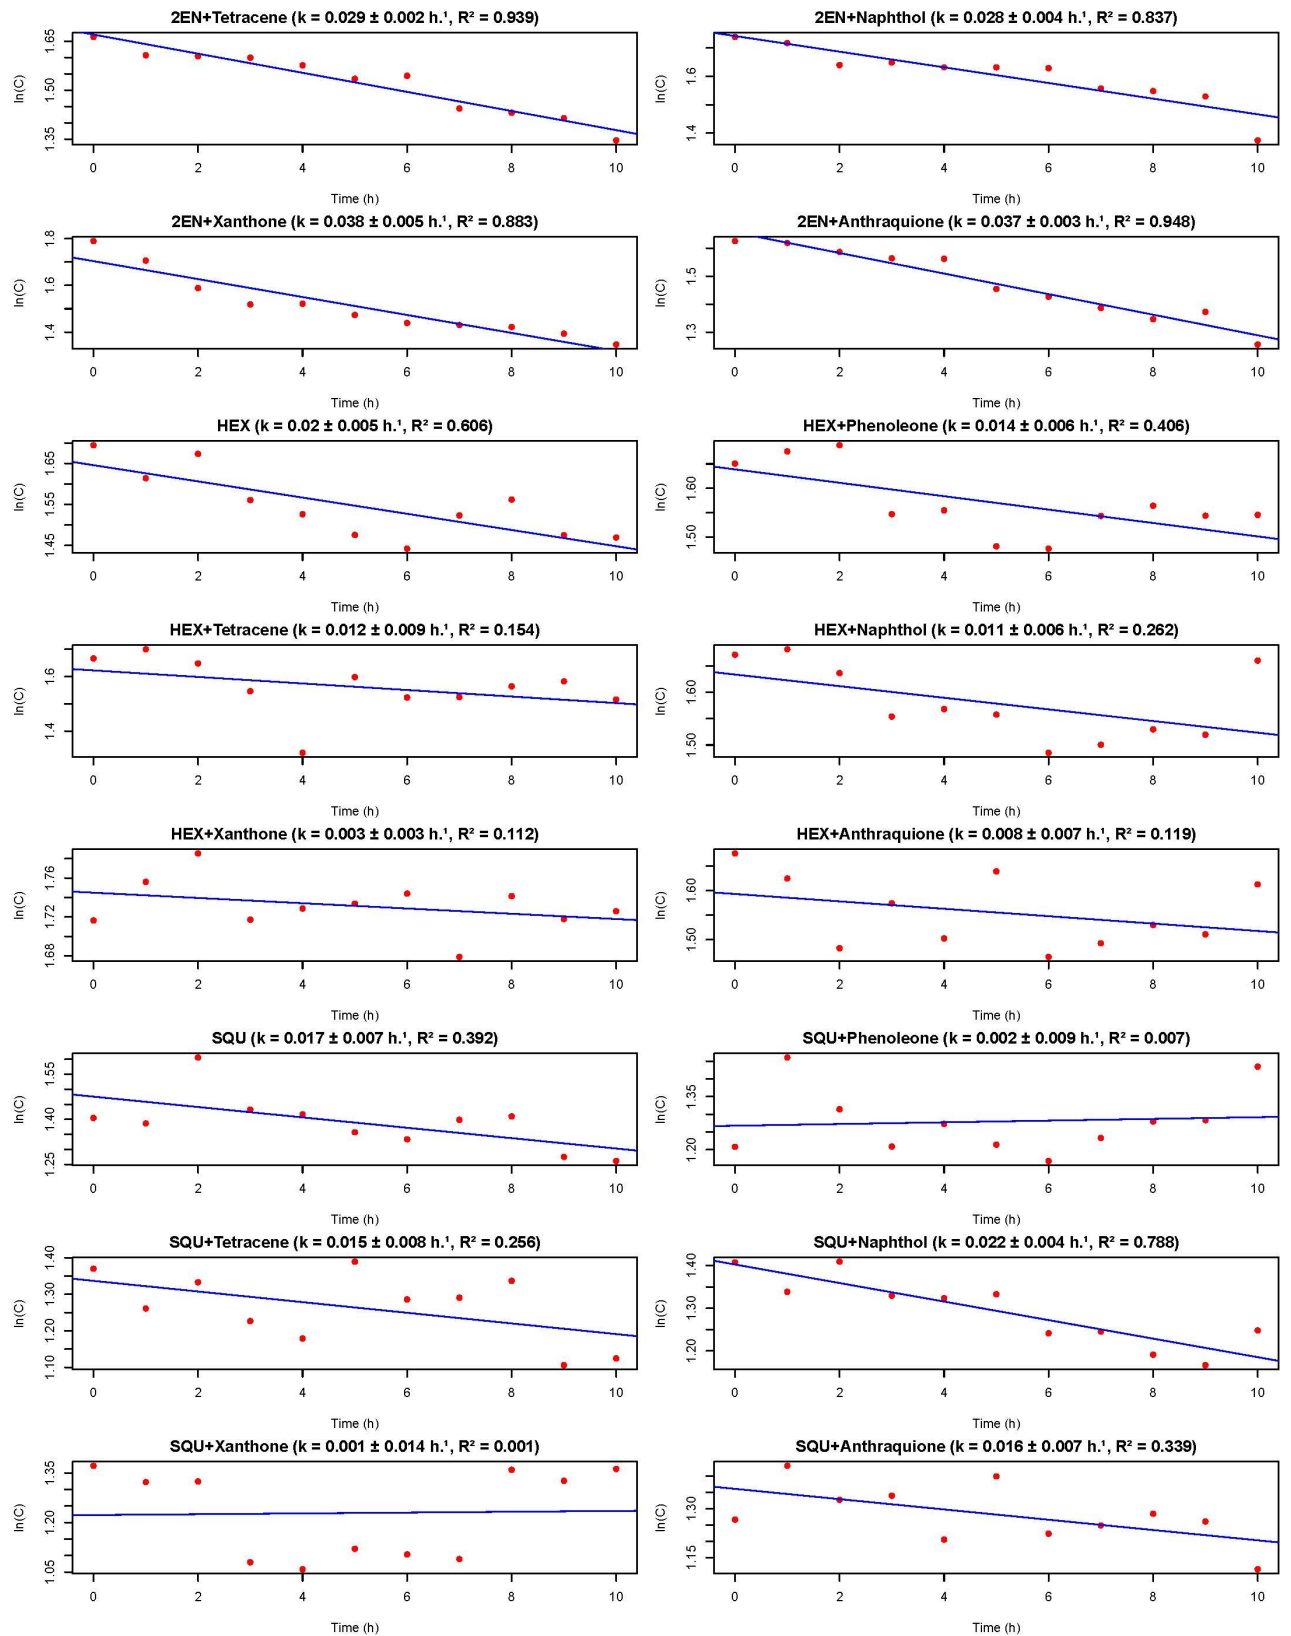

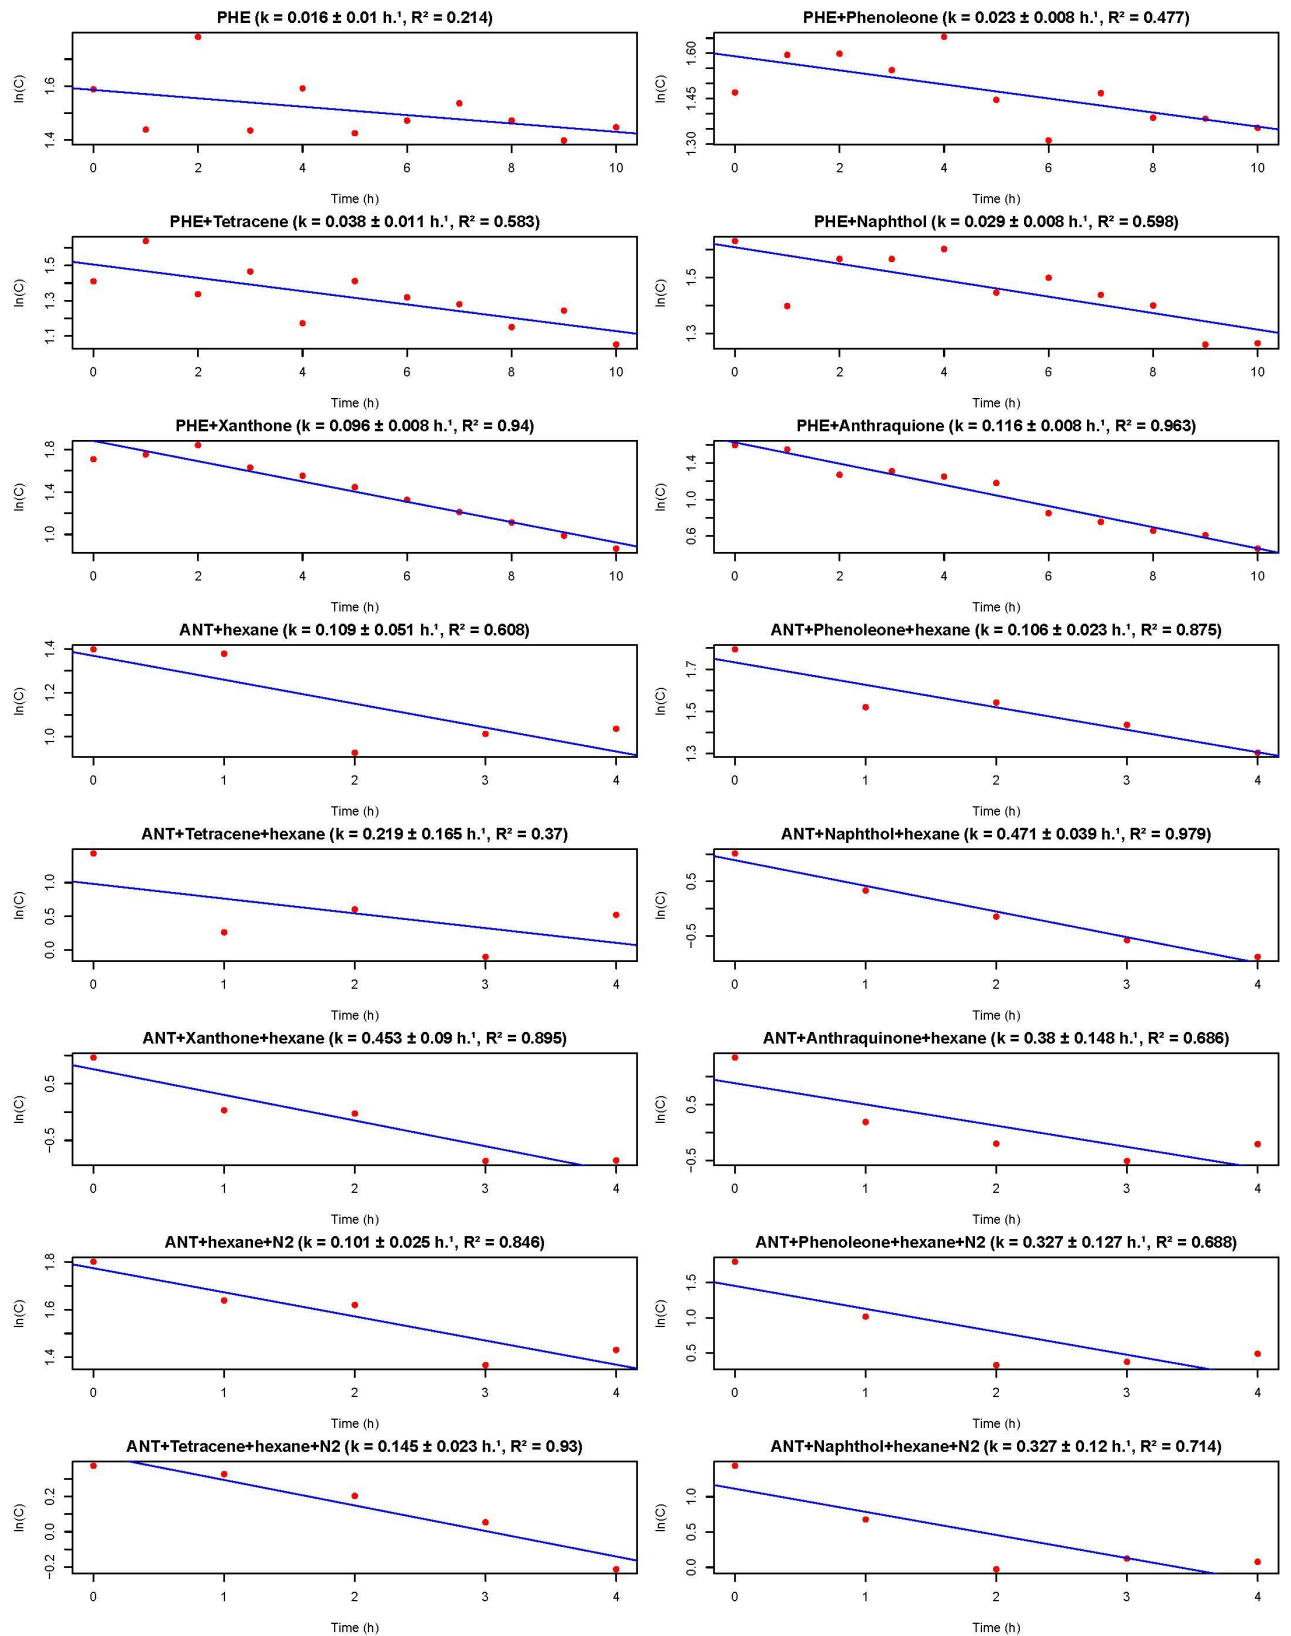

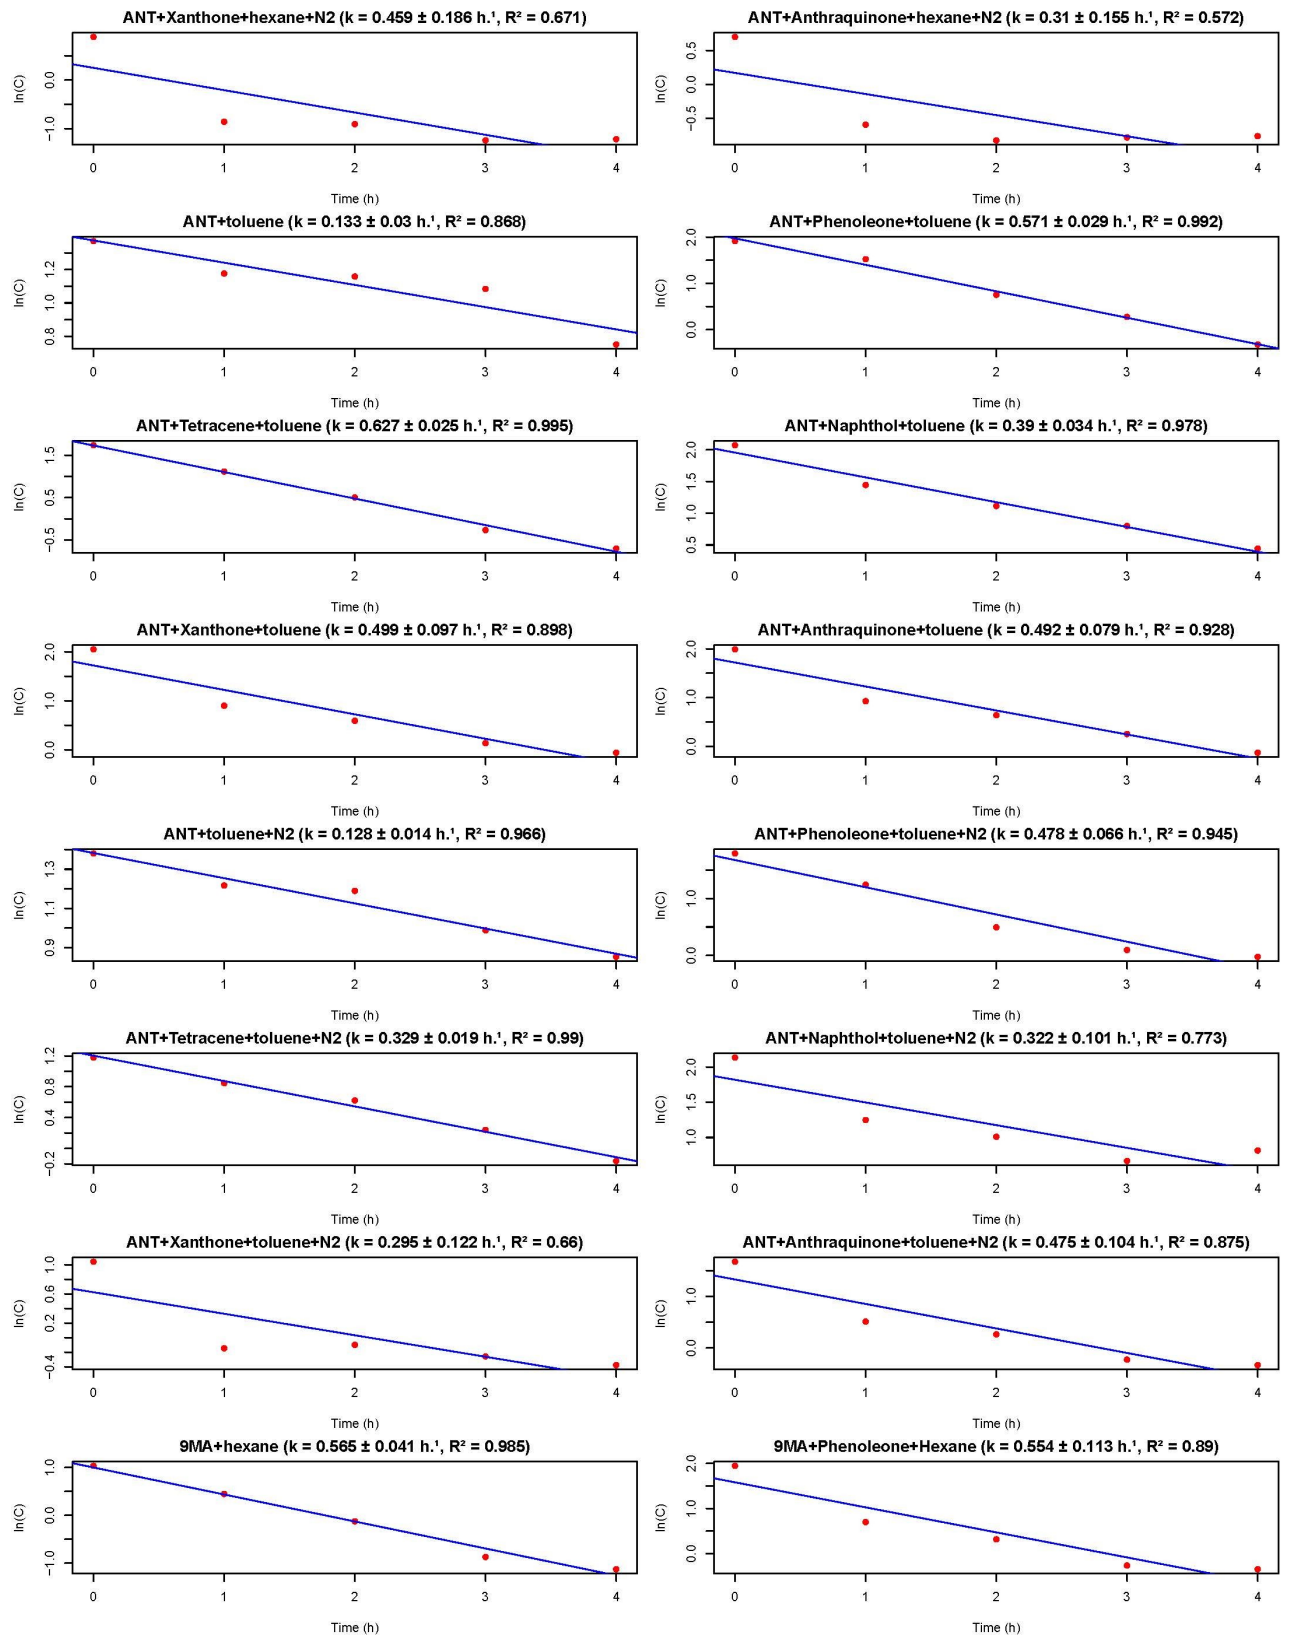

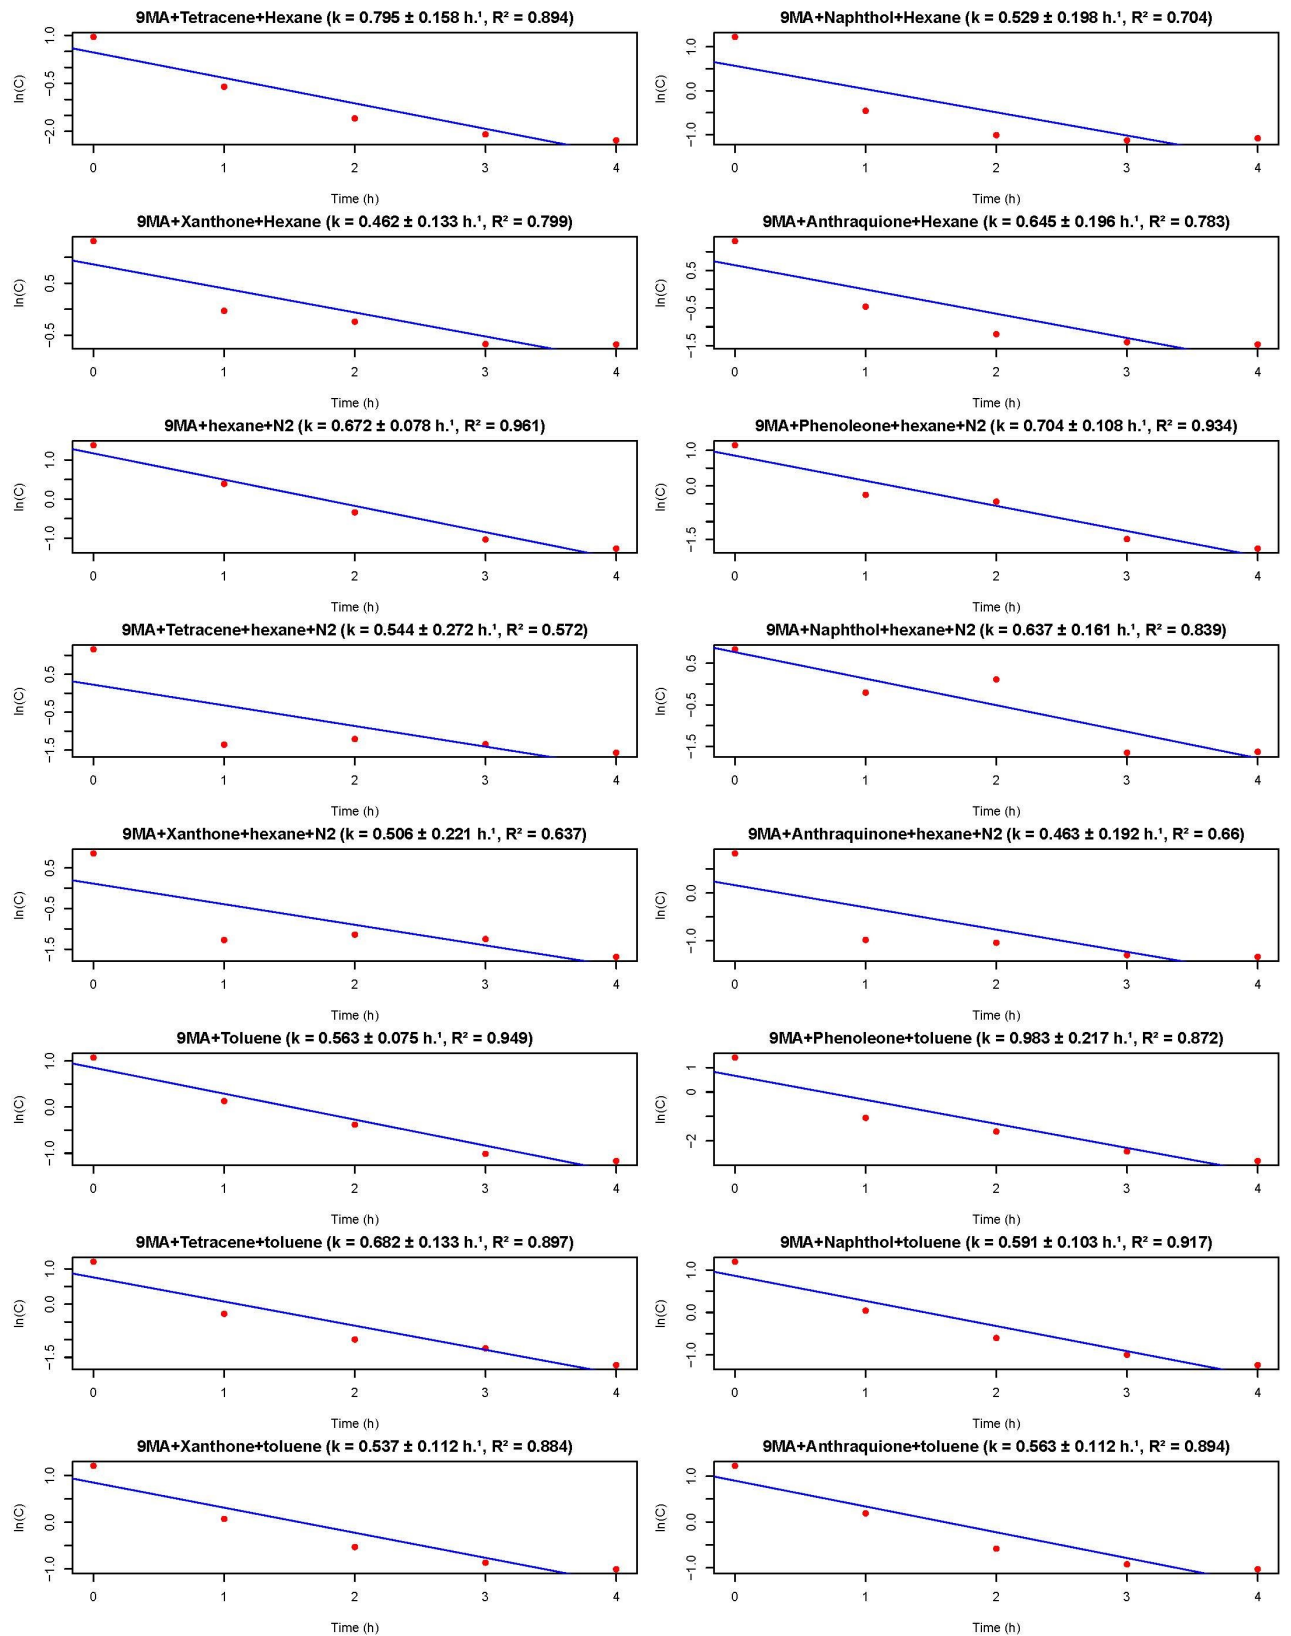

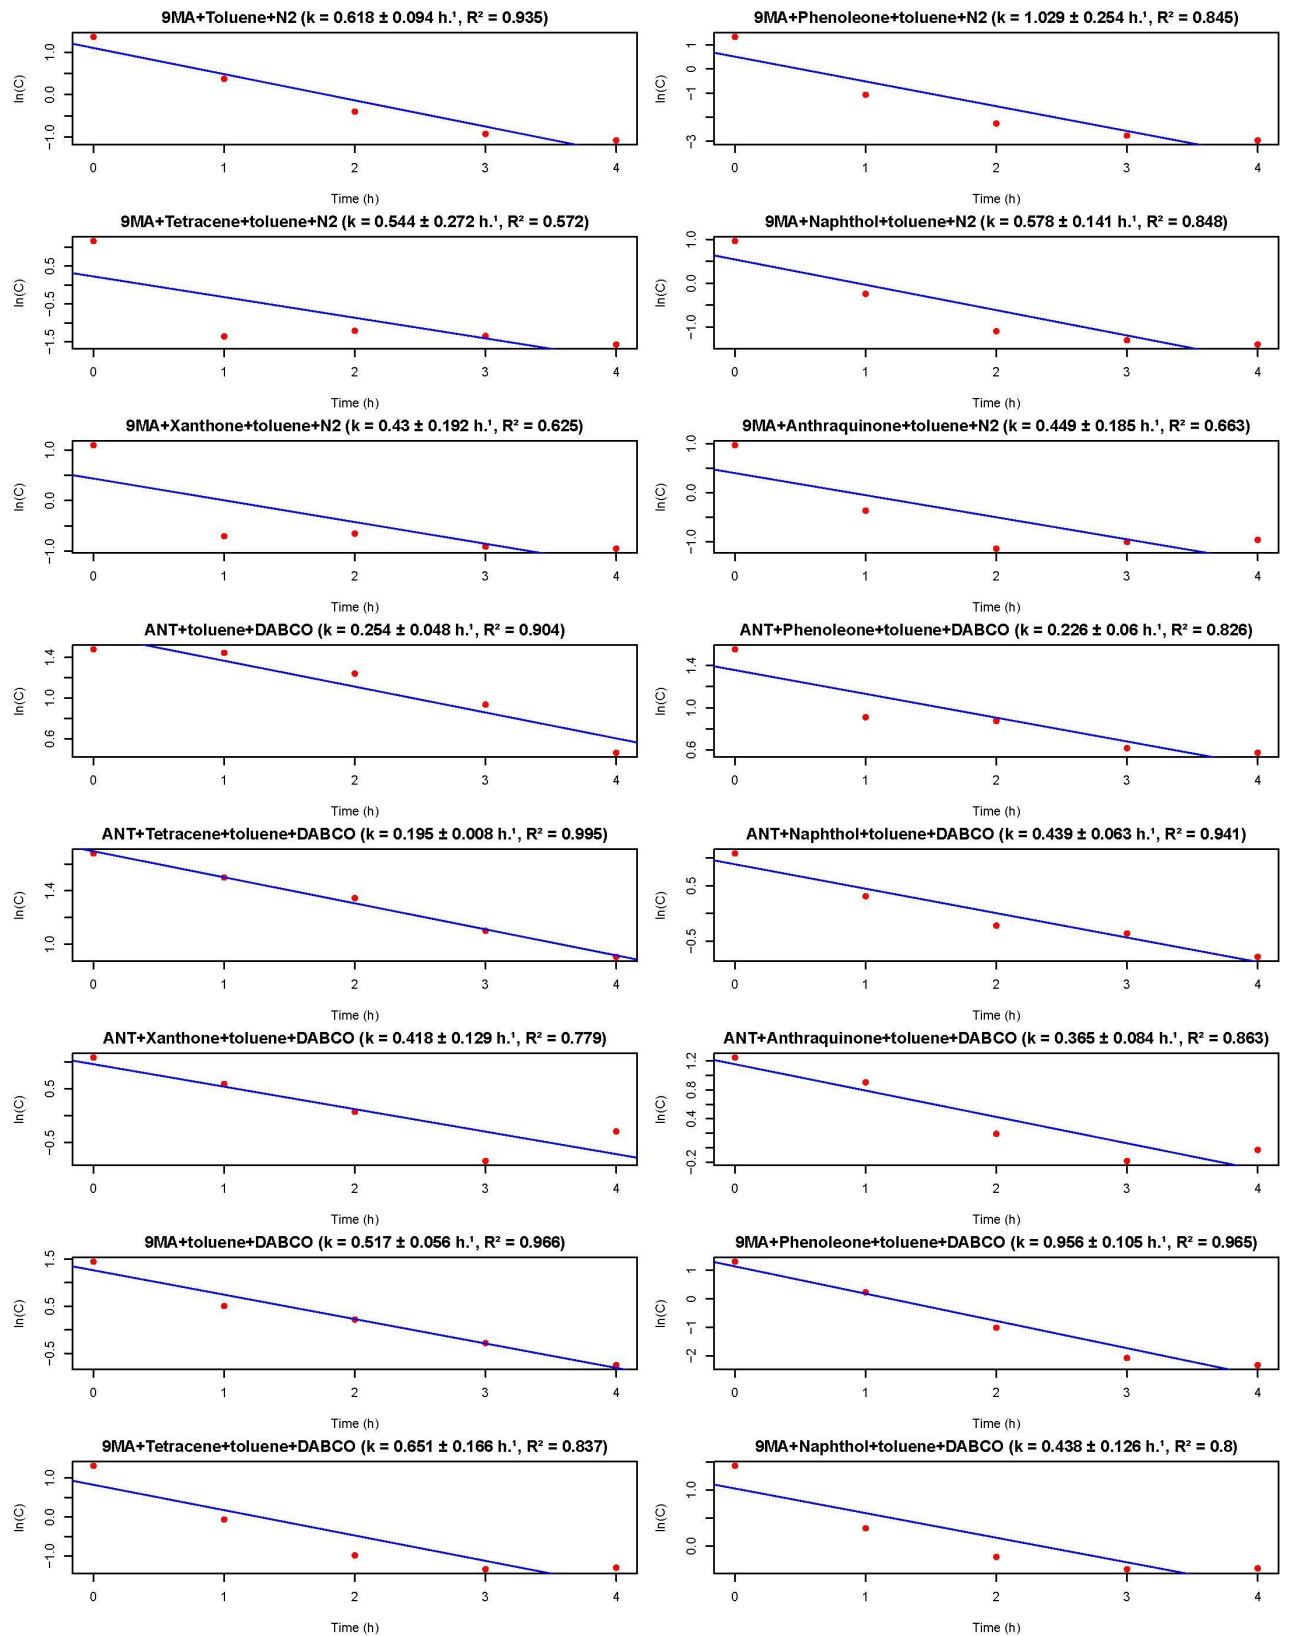

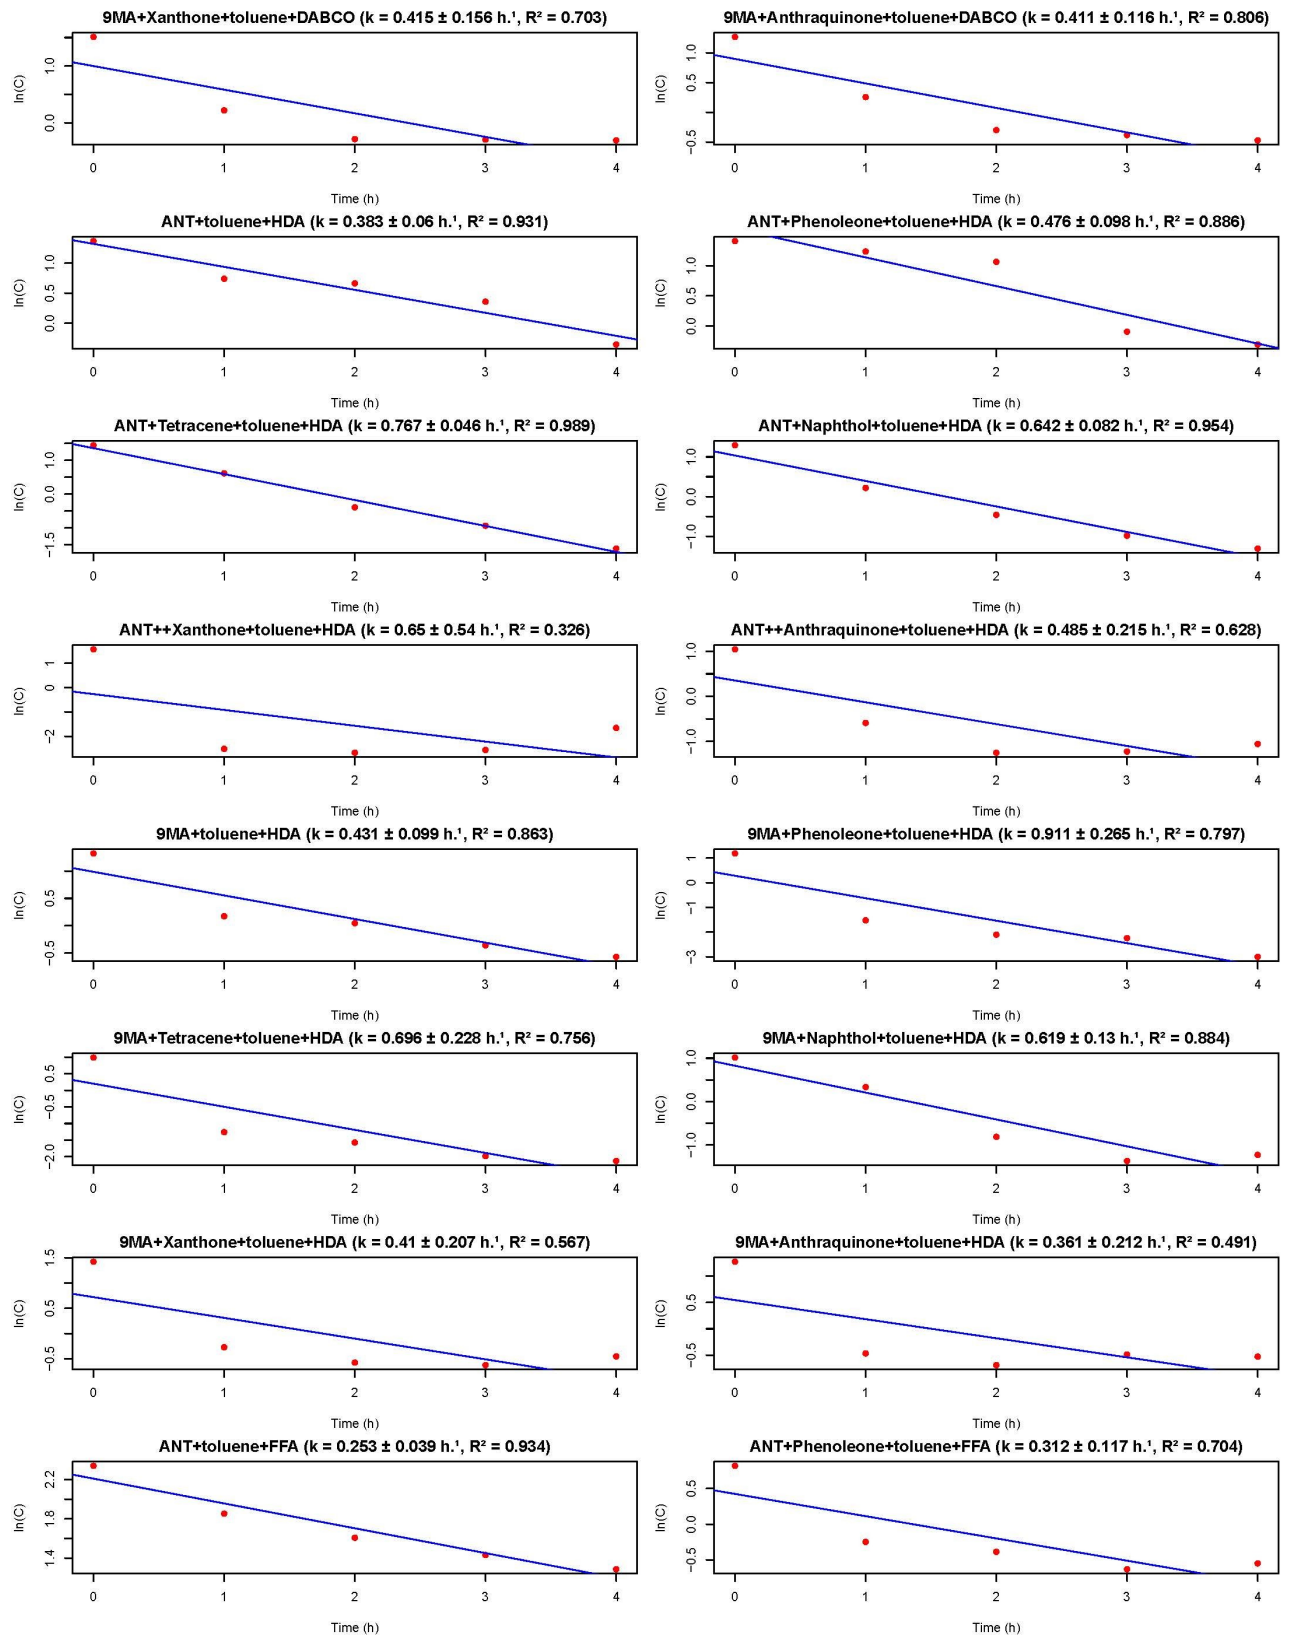

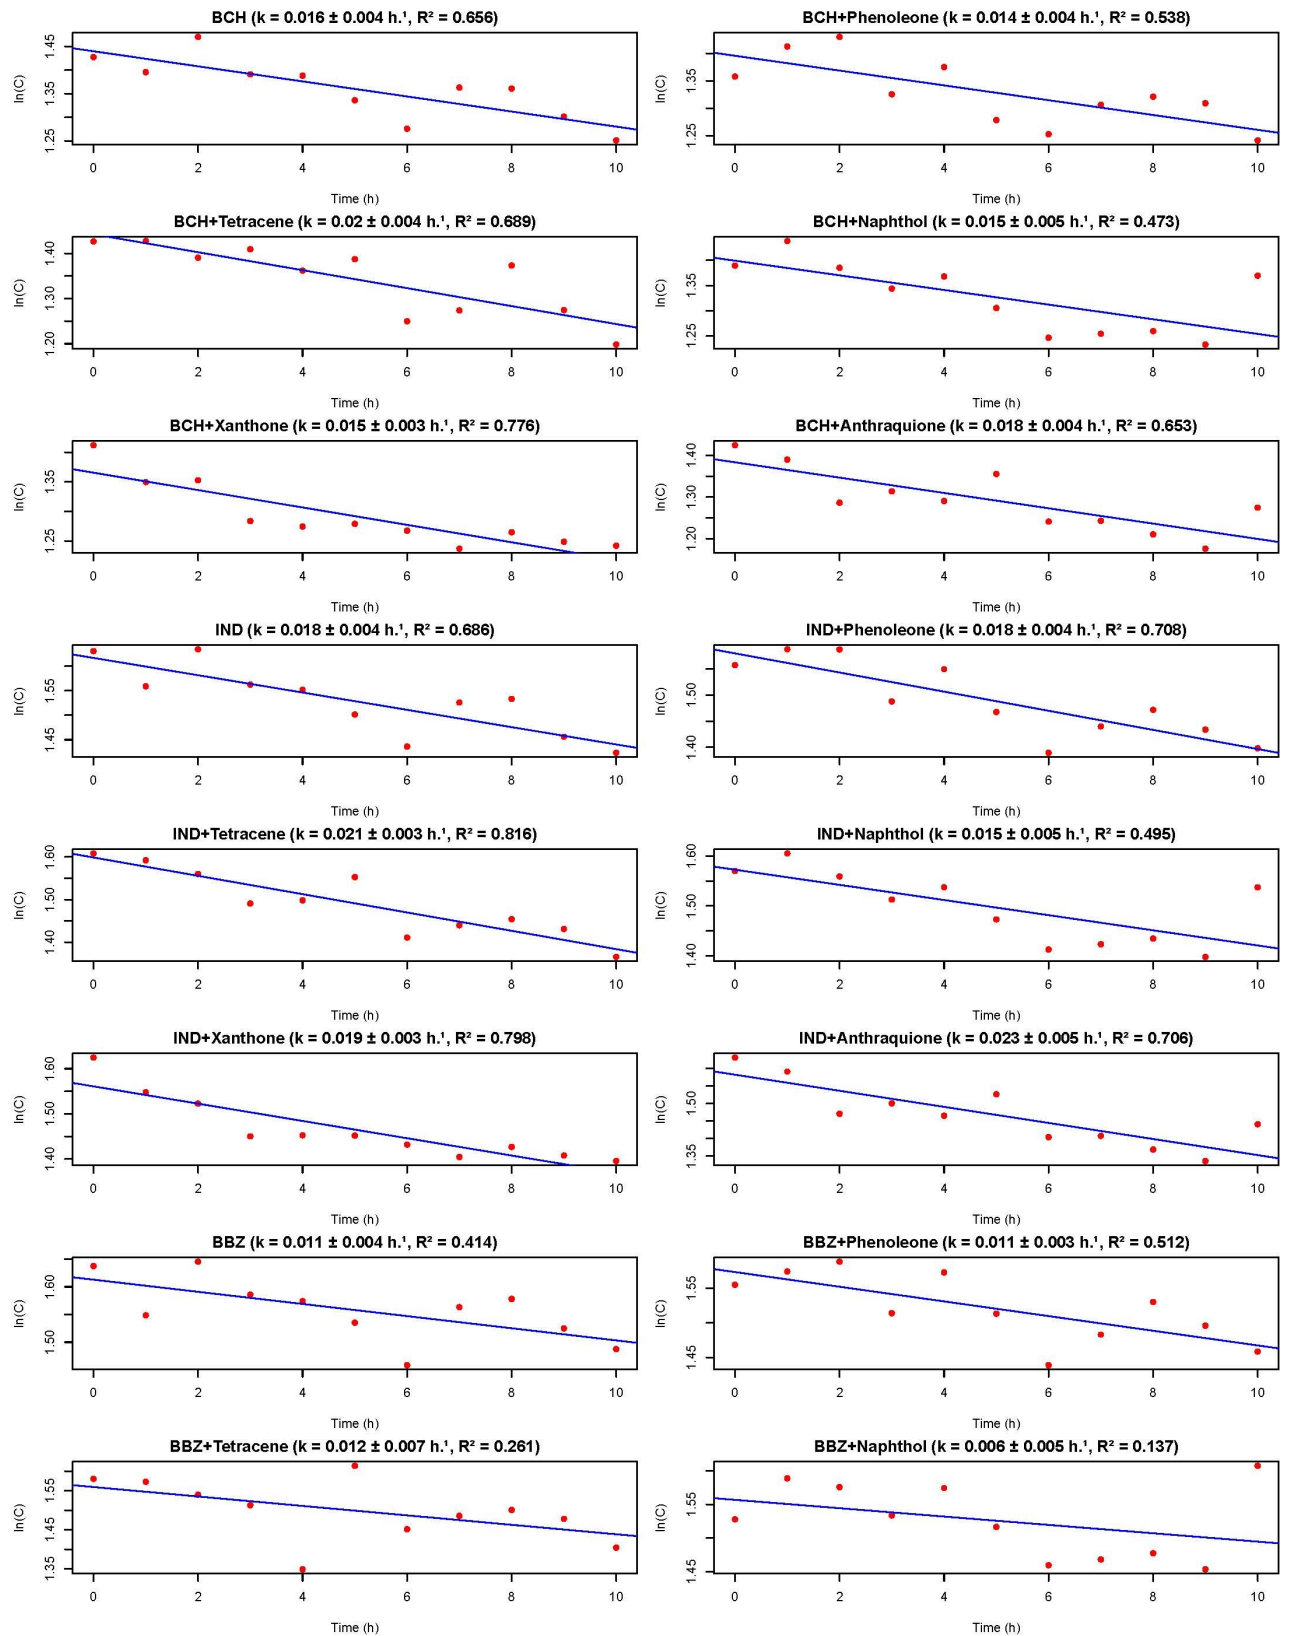

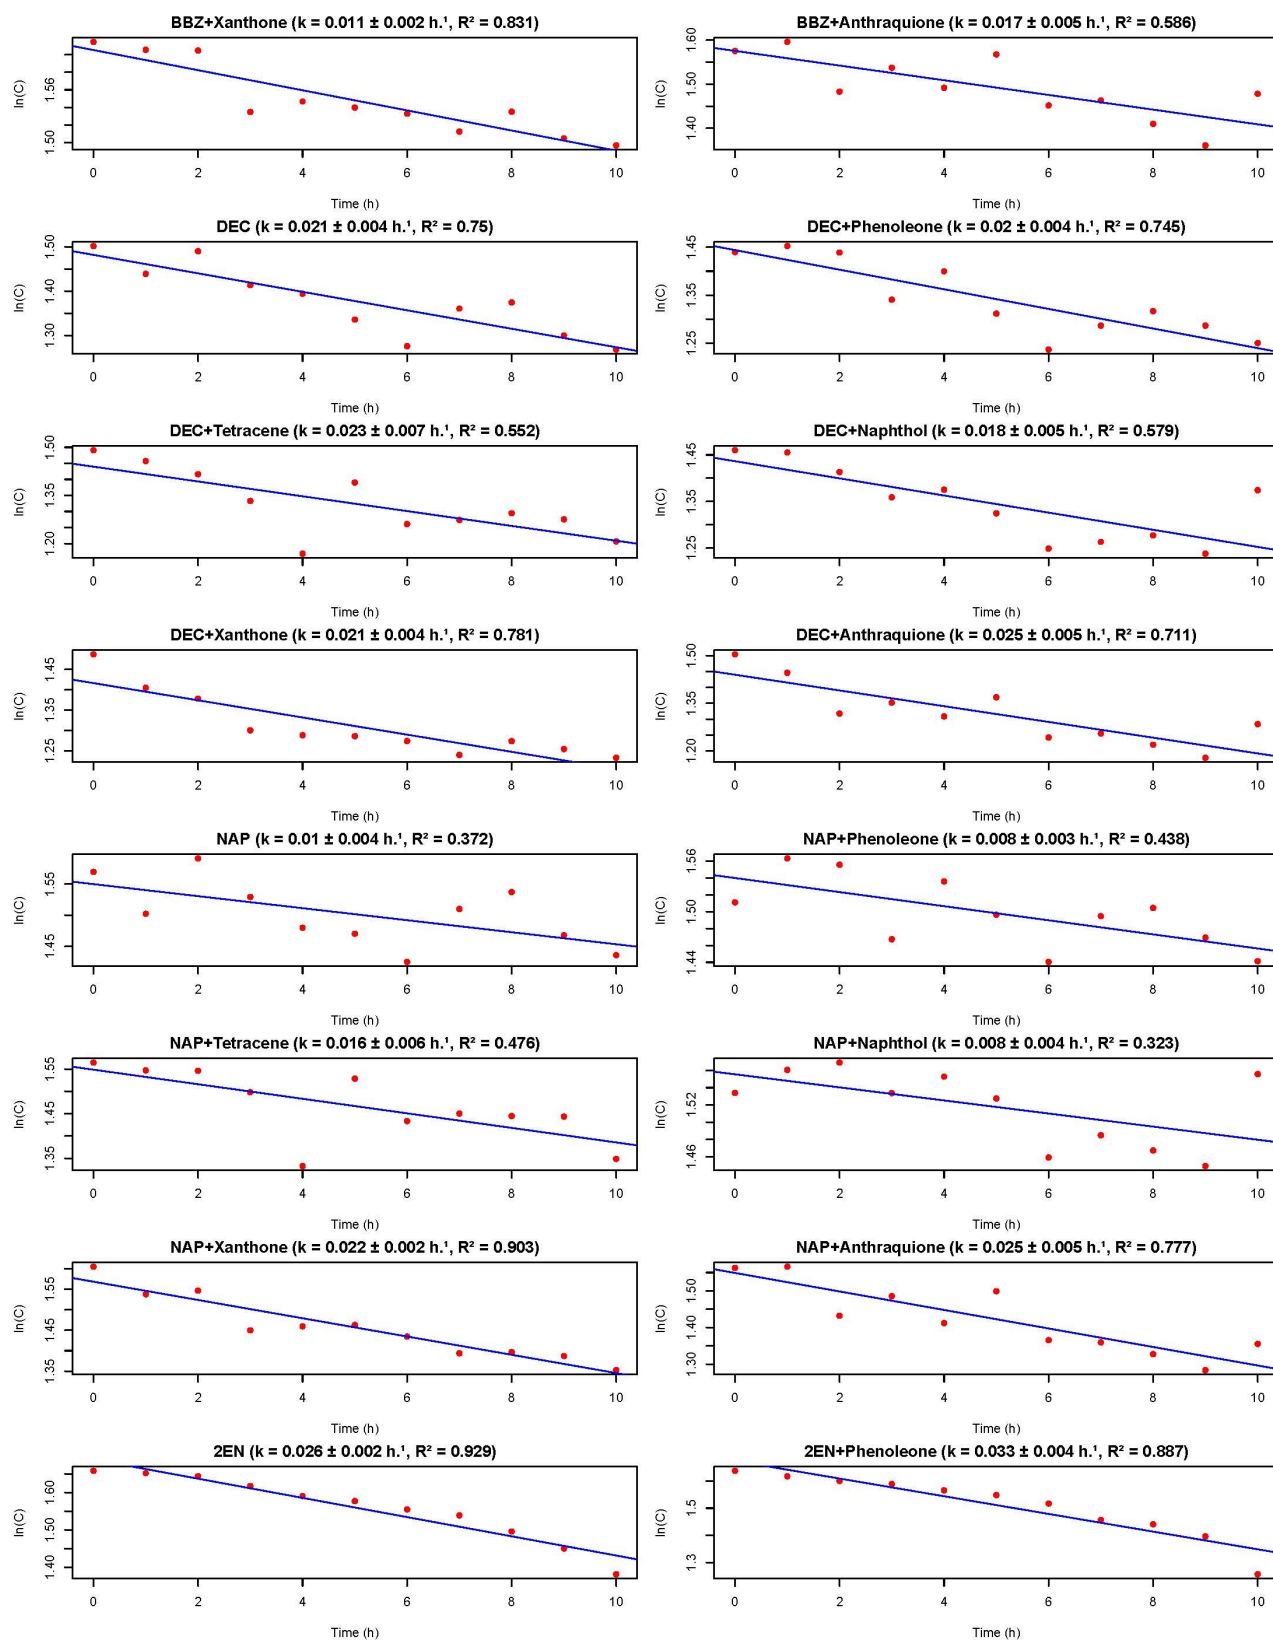

**Figure. A7.3** First-Order Kinetics of Compounds (95% Confidence Interval) \*

\*Unless otherwise noted, all experiments were conducted in air-saturated conditions.

## Reference

1. R. Zepp and P. Schlotzhauer, Photoreactivity of selected aromatic hydrocarbons in water, *Polynuclear Aromatic Hydrocarbons*, 1979, **3**.
2. A. Hörmann, G. Manivannan, R. Pagni, M. Sigman and J. Wirz, 1991.
3. K.-M. Lehto, E. Vuorimaa and H. Lemmetyinen, Photolysis of polycyclic aromatic hydrocarbons (PAHs) in dilute aqueous solutions detected by fluorescence, *Journal of Photochemistry and Photobiology A: Chemistry*, 2000, **136**, 53-60.
4. S. Sanches, C. Leitão, A. Penetra, V. V. Cardoso, E. Ferreira, M. J. Benoliel, M. T. B. Crespo and V. J. Pereira, Direct photolysis of polycyclic aromatic hydrocarbons in drinking water sources, *Journal of Hazardous Materials*, 2011, **192**, 1458-1465.
5. D. L. Plata, C. M. Sharpless and C. M. Reddy, Photochemical degradation of polycyclic aromatic hydrocarbons in oil films, *Environmental Science & Technology*, 2008, **42**, 2432-2438.
6. J. H. Smith, *Environmental pathways of selected chemicals in freshwater systems*, Environmental Protection Agency, Office of Research and Development ..., 1978.
7. R. G. Zepp, Quantum yields for reaction of pollutants in dilute aqueous solution, *Environmental Science & Technology*, 1978, **12**, 327-329.
8. R. Schmidt, K. Schaffner, W. Trost and H. Brauer, Wavelength-dependent and dual photochemistry of the endoperoxides of anthracene and 9, 10-dimethylanthracene, *The Journal of Physical Chemistry*, 1984, **88**, 956-958.
9. P. B. Merkel and W. G. Herkstroeter, The fate of oxygen in the quenching of excited singlet states, *Chemical Physics Letters*, 1978, **53**, 350-354.
10. W. Drews, R. Schmidt and H. D. Brauer, Generation of  $^{1}O_2$  from  $O_2$  quenching of the lowest excited singlet and triplet states of 9,10-diphenylanthracene, *Chemical Physics Letters*, 1983, **100**, 466-469.
11. B. Stevens and J. A. Ors, Photoperoxidation of unsaturated organic molecules. 16. Excitation energy fission, *The Journal of Physical Chemistry*, 1976, **80**, 2164-2165.
12. F. Wilkinson, W. P. Helman and A. B. Ross, Quantum Yields for the Photosensitized Formation of the Lowest Electronically Excited Singlet State of Molecular Oxygen in Solution, *Journal of Physical and Chemical Reference Data*, 1993, **22**, 113-262.
13. I. Gutiérrez, S. G. Bertolotti, M. A. Biasutti, A. T. Soltermann and N. A. García, Quinones and hydroxyquinones as generators and quenchers of singlet molecular oxygen, *Canadian Journal of Chemistry*, 1997, **75**, 423-428.
14. A. A. Abdel-Shafi and F. Wilkinson, Charge Transfer Effects on the Efficiency of Singlet Oxygen Production Following Oxygen Quenching of Excited Singlet and Triplet States of Aromatic Hydrocarbons in Acetonitrile, *The Journal of Physical Chemistry A*, 2000, **104**, 5747-5757.
15. K. McNeill and S. Canonica, Triplet state dissolved organic matter in aquatic photochemistry: reaction mechanisms, substrate scope, and photophysical properties, *Environmental Science: Processes & Impacts*, 2016, **18**, 1381-1399.
16. A. P. Snyakin, L. V. Samsonova, V. Y. Shlyapintokh and V. V. Ershov, Kinetics and mechanism of the interaction of sterically hindered phenols with singlet oxygen, *Bulletin of the Academy of Sciences of the USSR, Division of chemical science*, 1978, **27**, 46-52.
17. B. M. Monroe, Rates of reaction of singlet oxygen with olefins, *The Journal of Physical Chemistry*, 1978, **82**, 15-18.
18. M. Nowakowska,  $\beta$  - Carotene inhibited photooxidation of polystyrene, 1. Effect of  $\beta$  - carotene on photochemical reactivity of anthracene in hexane solution, *Die Makromolekulare Chemie: Macromolecular Chemistry and Physics*, 1980, **181**, 1013-1020.

19. M. Nowakowska and J. Kowal, Photochemical processes of 2,6-di-tert-butyl-4-methylphenol, *European Polymer Journal*, 1980, **16**, 615-618.
20. B. Stevens, S. R. Perez and J. A. Ors, Photoperoxidation of unsaturated organic molecules. XIV. O<sub>2</sub>.DELTA.g acceptor properties and reactivity, *Journal of the American Chemical Society*, 1974, **96**, 6846-6850.
21. E. Bowen, Reactions in the liquid phase. Photochemistry of anthracene. Part 1.—The photo-oxidation of anthracene in solution, *Discussions of the Faraday Society*, 1953, **14**, 143-146.
22. T. A. Jenny and N. J. Turro, Solvent and deuterium isotope effects on the lifetime of singlet oxygen determined by direct emission spectroscopy at 1.27  $\mu\text{m}$ , *Tetrahedron Letters*, 1982, **23**, 2923-2926.
23. B. E. Algar and B. Stevens, Photoperoxidation of unsaturated organic molecules. VI. Inhibited reaction, *The Journal of Physical Chemistry*, 1970, **74**, 3029-3034.
24. I. B. Matheson, R. D. Etheridge, N. R. Kratoch and J. Lee, The quenching of singlet oxygen by amino acids and proteins, *Photochem Photobiol*, 1975, **21**, 165-171.
25. A. A. Krasnovsky Jr., PHOTOLUMINESCENCE OF SINGLET OXYGEN IN PIGMENT SOLUTIONS, *Photochemistry and Photobiology*, 1979, **29**, 29-36.
